# Supplementary material for: Paired Comparison of Routine Molecular Screening of Patient Samples with Advanced Non-Small Cell Lung Cancer in Circulating Cell-Free DNA Using Three Targeted Assays
Source: MDPI journal article supplement (doi:10.3390/cancers15051574), 2023-03-03
Supplement: s1 [file s1]

**Table S1.** cfDNA molecular profiling of samples with discordant findings in at least one assay. \* denotes actionable alterations; Bold denotes the *EGFR* gene. Status: (DI: at diagnosis; P: during progression; ND: Non Determined). The color gradient shows the Mutated Allelic Frequency (MAF): (Red: absence of alteration (MAF =0%); darker blue shows higher MAF levels).

| ID Samples | Status<br>(DI: at diagnosis; P: during progression) | Somatic alterations       | MAF %<br>Plasma-SeqSensei™<br>SOLID CANCER IVD kit | MAF %<br>Plasma OncoBEAM™<br>EGFR V2 | DNA content [ng input] Plasma-Se-<br>qSensei™ SOLID CANCER IVD kit | DNA content [ng input] on<br>Plasma OncoBEAM™ EGFR<br>V2 | content [ng input] of Plasma<br>OncoBEAM™ EGFR V2<br>/content [ng input] of<br>Plasma-SeqSensei™ SOLID<br>CANCER IVD kit |
|------------|-----------------------------------------------------|---------------------------|----------------------------------------------------|--------------------------------------|--------------------------------------------------------------------|----------------------------------------------------------|--------------------------------------------------------------------------------------------------------------------------|
| 2379       | P                                                   | EGFRp.(Thr790Met)*        | 0.00                                               | 0.01                                 | 6.75                                                               | 14.02                                                    | 0.48                                                                                                                     |
| 1881       | DI                                                  | EGFRp.(Leu858Arg)*        | 0.00                                               | 0.02                                 | 81.25                                                              | 108.45                                                   | 0.75                                                                                                                     |
| 2018       | P                                                   | EGFRp.(Thr790Met)*        | 0.00                                               | 0.03                                 | 37.50                                                              | 21.59                                                    | 1.74                                                                                                                     |
| 1519       | P                                                   | EGFRp.(Thr790Met)*        | 0.00                                               | 0.04                                 | 25.00                                                              | 13.81                                                    | 1.81                                                                                                                     |
| 2379       | P                                                   | EGFRp.(Glu746_Ala750del)* | 0.00                                               | 0.05                                 | 6.75                                                               | 14.02                                                    | 0.48                                                                                                                     |
| 1419       | P                                                   | EGFRp.(Leu858Arg)*        | 0.00                                               | 0.05                                 | 25.00                                                              | 18.28                                                    | 1.37                                                                                                                     |
| 2045       | P                                                   | EGFRp.(Thr790Met)*        | 0.00                                               | 0.05                                 | 5.89                                                               | 9.35                                                     | 0.63                                                                                                                     |
| 2045       | P                                                   | EGFRp.(Glu746_Ala750del)* | 0.00                                               | 0.05                                 | 5.89                                                               | 9.35                                                     | 0.63                                                                                                                     |
| 1827       | P                                                   | EGFRp.(Glu746_Ala750del)* | 0.00                                               | 0.05                                 | 6.29                                                               | 6.23                                                     | 1.01                                                                                                                     |
| 1622       | P                                                   | EGFRp.(Leu858Arg)*        | 0.00                                               | 0.06                                 | 16.64                                                              | 9.49                                                     | 1.75                                                                                                                     |
| 1511       | P                                                   | EGFRp.(Glu746_Ala750del)* | 0.00                                               | 0.08                                 | 16.75                                                              | 8.20                                                     | 2.04                                                                                                                     |
| 1594       | P                                                   | EGFRp.(Thr790Met)*        | 0.00                                               | 0.14                                 | 20.00                                                              | 12.54                                                    | 1.59                                                                                                                     |
| 1519       | P                                                   | EGFRp.(Glu746_Ala750del)* | 0.00                                               | 0.15                                 | 25.00                                                              | 13.81                                                    | 1.81                                                                                                                     |
| 1814       | P                                                   | EGFRp.(Thr790Met)*        | 0.00                                               | 0.05                                 | 31.25                                                              | 20.35                                                    | 1.54                                                                                                                     |
| 1938       | ND                                                  | PIK3CA(p.His1047Arg)      | 0.06                                               | 0.00                                 | 85.00                                                              | 5164.75                                                  | 0.02                                                                                                                     |
| 2010       | DI                                                  | KRAS(p.Gly12Cys)*         | 0.08                                               | 0.00                                 | 36.81                                                              | 58.70                                                    | 0.63                                                                                                                     |
| 2105       | P                                                   | EGFRp.(Leu718Gln)         | 0.18                                               | 0.00                                 | 35.81                                                              | 33.09                                                    | 1.08                                                                                                                     |
| 2476       | P                                                   | EGFRp.(Leu718Gln)         | 0.18                                               | 0.00                                 | 36.81                                                              | 31.88                                                    | 1.15                                                                                                                     |
| 1966       | DI                                                  | PIK3CA(p.E545Q)           | 0.21                                               | 0.00                                 | 36.81                                                              | 120.89                                                   | 0.30                                                                                                                     |
| 2229       | DI                                                  | KRASp.(Gln61Arg)          | 0.25                                               | 0.00                                 | 30.25                                                              | 31.60                                                    | 0.96                                                                                                                     |
| 2724       | P                                                   | EGFRp.(Ser768Ile)*        | 0.39                                               | 0.00                                 | 31.25                                                              | 43.13                                                    | 0.72                                                                                                                     |

|      |    |                           |       |      |       |         |      |
|------|----|---------------------------|-------|------|-------|---------|------|
| 1464 | DI | EGFRp.(Ala871Gly)         | 0.39  | 0.00 | 36.81 | 25.82   | 1.43 |
| 2009 | DI | KRASp.(Gly12Asp)          | 0.50  | 0.00 | 85.00 | 72.72   | 1.17 |
| 2460 | DI | BRAFp.(Val600Glu)*        | 0.50  | 0.00 | 15.62 | 30.51   | 0.51 |
| 2428 | P  | EGFRp.(Leu718Gln)         | 0.52  | 0.00 | 37.50 | 91.04   | 0.41 |
| 2325 | P  | KRASp.(Met72Leu)          | 0.55  | 0.00 | 15.45 | 12.37   | 1.25 |
| 2453 | DI | BRAFp.(Val600Glu)*        | 0.59  | 0.00 | 6.24  | 10.39   | 0.60 |
| 2547 | P  | KRASp.(Met72Leu)          | 0.68  | 0.00 | 37.50 | 39.47   | 0.95 |
| 2460 | DI | PIK3CAp.(Glu545Lys)       | 0.70  | 0.00 | 15.62 | 30.51   | 0.51 |
| 2497 | P  | KRASp.(Met72Leu)          | 0.97  | 0.00 | 23.66 | 23.05   | 1.03 |
| 1962 | DI | PIK3CAp.(Glu545Gln)       | 1.14  | 0.00 | 36.81 | 110.80  | 0.33 |
| 2463 | DI | KRASp.(Gly12Val)          | 1.20  | 0.00 | 26.87 | 25.65   | 1.05 |
| 1603 | ND | EGFRp.(Ser768Ile)*        | 1.21  | 0.00 | 14.14 | 11.05   | 1.28 |
| 2455 | DI | EGFRp.(Ile744.)           | 1.40  | 0.00 | 16.87 | 18.92   | 0.89 |
| 2019 | DI | BRAFp.(Val600Glu)*        | 1.72  | 0.00 | 14.63 | 22.36   | 0.65 |
| 2455 | DI | PIK3CAp.(Glu542Lys)       | 1.90  | 0.00 | 16.87 | 18.92   | 0.89 |
| 2268 | ND | EGFRp.(Ser768Ile)*        | 2.37  | 0.00 | 25.98 | 46.31   | 0.56 |
| 1887 | P  | EGFRp.(Ala767_Val769dup)* | 4.13  | 0.00 | 31.25 | 25.35   | 1.23 |
| 1564 | DI | KRASp.(Gly12Cys)*         | 10.23 | 0.00 | 36.81 | 8.51    | 4.32 |
| 1845 | DI | KRASp.(Gly12Asp)          | 10.48 | 0.00 | 21.30 | 18.44   | 1.16 |
| 1938 | ND | PIK3CAp.(Glu545Lys)       | 13.95 | 0.00 | 85.00 | 5164.75 | 0.02 |
| 1895 | DI | PIK3CAp.(Glu545Lys)       | 15.14 | 0.00 | 43.75 | 48.71   | 0.90 |
| 1870 | DI | KRASp.(Gly12Asp)          | 19.50 | 0.00 | 81.25 | 72.92   | 1.11 |
| 1835 | DI | KRASp.(Gly12Asp)          | 21.17 | 0.00 | 75.00 | 56.59   | 1.33 |
| 2336 | DI | PIK3CAp.(Glu545Lys)       | 27.58 | 0.00 | 36.88 | 37.69   | 0.98 |
| 1579 | DI | KRASp.(Gly12Cys)*         | 35.81 | 0.00 | 36.81 | 157.20  | 0.23 |
| 1901 | DI | KRASp.(Gly12Asp)          | 45.73 | 0.00 | 81.25 | 96.99   | 0.84 |

**Table S2.** CfDNA molecular profiling of samples with discordance findings in the custom-validated NGS assay and the Plasma-SeqSensei™ SOLID CANCER IVD assays of targeted genes of Plasma-SeqSensei™ SOLID CANCER IVD assay. \* denotes actionable alterations; Bold denotes the *EGFR* gene. Status: (DI: at diagnosis; P: during progression; ND: Non Determined). The color gradient shows the Mutated Allelic Frequency (MAF): (Red: absence of alteration (MAF =0%); darker blue shows higher MAF levels).

| ID Samples | Status<br>(DI: at diagnosis; P: during progression) | Alteration                       | MAF %<br>Plasma-SeqSensei™<br>SOLID CANCER IVD kit | MAF %<br>custom-validated NGS<br>assay | CfDNA input [ng input]<br>of Plasma-SeqSensei™ SOLID CANCER IVD kit | CfDNA content [ng input]<br>custom-validated NGS assay | Ratio of cfDNA content [ng input]<br>of Plasma-SeqSensei™ SOLID CANCER IVD kit /cfDNA<br>content [ng input]custom-validated NGS assay |
|------------|-----------------------------------------------------|----------------------------------|----------------------------------------------------|----------------------------------------|---------------------------------------------------------------------|--------------------------------------------------------|---------------------------------------------------------------------------------------------------------------------------------------|
| 2441       | DI                                                  | KRASp.(Gly12Cys)*                | 0.00                                               | 0.50                                   | 3.44                                                                | 8.49                                                   | 0.41                                                                                                                                  |
| 2151       | DI                                                  | PIK3CAp.(Arg524Lys)              | 0.00                                               | 1.40                                   | 11.56                                                               | 35.00                                                  | 0.33                                                                                                                                  |
| 2387       | P                                                   | BRAFp.(Asp594Asn)                | 0.00                                               | 1.50                                   | 36.88                                                               | 37.50                                                  | 0.98                                                                                                                                  |
| 1843       | DI                                                  | <b>EGFRp.(Leu62Arg)</b>          | 0.00                                               | 1.90                                   | 81.25                                                               | 50.00                                                  | 1.63                                                                                                                                  |
| 1962       | DI                                                  | PIK3CAp.(Glu418Lys)              | 0.00                                               | 3.60                                   | 36.81                                                               | 150.00                                                 | 0.25                                                                                                                                  |
| 1845       | DI                                                  | PIK3CAp.(Arg88Gln)               | 0.00                                               | 7.40                                   | 21.30                                                               | 44.00                                                  | 0.48                                                                                                                                  |
| 1517       | ND                                                  | <b>EGFRp.(Val834Leu)</b>         | 0.00                                               | 14.40                                  | 36.81                                                               | 50.00                                                  | 0.74                                                                                                                                  |
| 1500       | P                                                   | PIK3CAp.(Cys420Arg)              | 0.00                                               | 24.00                                  | 25.00                                                               | 48.00                                                  | 0.52                                                                                                                                  |
| 2338       | DI                                                  | <b>EGFRp.(Gly779Cys)</b>         | 0.00                                               | 31.70                                  | 82.50                                                               | 100.00                                                 | 0.83                                                                                                                                  |
| 2025       | P                                                   | <b>EGFRp.(Val843Ile)</b>         | 0.00                                               | 45.40                                  | 10.31                                                               | 25.80                                                  | 0.40                                                                                                                                  |
| 1596       | P                                                   | <b>EGFRp.(Val834Leu)</b>         | 0.00                                               | 63.80                                  | 36.81                                                               | 50.00                                                  | 0.74                                                                                                                                  |
| 2909       | P                                                   | <b>EGFRp.(Leu833Phe)</b>         | 0.00                                               | 85.60                                  | 37.50                                                               | 100.00                                                 | 0.38                                                                                                                                  |
| 2377       | P                                                   | <b>EGFRp.(Glu746_Ala750del)*</b> | 0.02                                               | 0.00                                   | 36.81                                                               | 72.30                                                  | 0.51                                                                                                                                  |
| 1830       | P                                                   | <b>EGFRp.(Leu858Arg)*</b>        | 0.02                                               | 0.00                                   | 36.81                                                               | 50.00                                                  | 0.74                                                                                                                                  |
| 1938       | ND                                                  | PIK3CA(p.His1047Arg)             | 0.06                                               | 0.00                                   | 85.00                                                               | 150.00                                                 | 0.57                                                                                                                                  |
| 2230       | DI                                                  | <b>EGFRp.(Glu746_Ala750del)*</b> | 0.07                                               | 0.00                                   | 36.81                                                               | 72.00                                                  | 0.51                                                                                                                                  |
| 2010       | DI                                                  | KRAS(p.Gly12Cys)*                | 0.08                                               | 0.00                                   | 36.81                                                               | 117.50                                                 | 0.31                                                                                                                                  |
| 2181       | DI                                                  | <b>EGFRp.(Glu746_Ala750del)*</b> | 0.13                                               | 0.00                                   | 36.81                                                               | 150.00                                                 | 0.25                                                                                                                                  |

|      |    |                           |      |      |       |        |      |
|------|----|---------------------------|------|------|-------|--------|------|
| 2105 | P  | EGFRp.(Thr790Met)*        | 0.17 | 0.00 | 35.81 | 77.00  | 0.47 |
| 2105 | P  | EGFRp.(Leu718Gln)         | 0.18 | 0.00 | 35.81 | 77.00  | 0.47 |
| 2476 | P  | EGFRp.(Leu718Gln)         | 0.18 | 0.00 | 36.81 | 100.00 | 0.37 |
| 1740 | P  | EGFRp.(Leu858Arg)*        | 0.19 | 0.00 | 25.00 | 50.00  | 0.50 |
| 2486 | P  | EGFRp.(Cys797Ser)*        | 0.20 | 0.00 | 36.25 | 84.40  | 0.43 |
| 2909 | P  | EGFRp.(Cys797Ser)*        | 0.20 | 0.00 | 37.50 | 100.00 | 0.38 |
| 1966 | DI | PIK3CA(p.E545Q)           | 0.21 | 0.00 | 36.81 | 150.00 | 0.25 |
| 2229 | DI | KRASp.(Gln61Arg)*         | 0.25 | 0.00 | 30.25 | 54.00  | 0.56 |
| 1594 | P  | EGFRp.(Leu858Arg)*        | 0.28 | 0.00 | 20.00 | 30.00  | 0.67 |
| 2497 | P  | EGFRp.(Leu858Arg)*        | 0.28 | 0.00 | 23.66 | 28.30  | 0.84 |
| 2912 | DI | KRASp.(Gly12Asp)*         | 0.29 | 0.00 | 37.50 | 100.00 | 0.38 |
| 2547 | P  | EGFRp.(Leu858Arg)*        | 0.30 | 0.00 | 37.50 | 37.00  | 1.01 |
| 2486 | P  | EGFRp.(Thr790Met)*        | 0.30 | 0.00 | 36.25 | 84.40  | 0.43 |
| 2700 | P  | EGFRp.(Leu861Gln)*        | 0.35 | 0.00 | 36.81 | 52.30  | 0.70 |
| 2876 | DI | KRASp.(Lys117Asn)*        | 0.35 | 0.00 | 17.40 | 15.10  | 1.15 |
| 1601 | P  | EGFRp.(Thr790Met)*        | 0.37 | 0.00 | 25.00 | 35.00  | 0.71 |
| 2724 | P  | EGFRp.(Ser768Ile)*        | 0.39 | 0.00 | 31.25 | 66.00  | 0.47 |
| 2476 | P  | EGFRp.(Thr790Met)*        | 0.43 | 0.00 | 36.81 | 100.00 | 0.37 |
| 2428 | P  | EGFRp.(Leu718Gln)         | 0.52 | 0.00 | 37.50 | 100.00 | 0.38 |
| 2476 | P  | EGFRp.(Leu858Arg)*        | 0.61 | 0.00 | 36.81 | 100.00 | 0.37 |
| 2547 | P  | KRASp.(Met72Leu)*         | 0.68 | 0.00 | 37.50 | 37.00  | 1.01 |
| 2428 | P  | EGFRp.(Thr790Met)*        | 0.83 | 0.00 | 37.50 | 100.00 | 0.38 |
| 2017 | P  | EGFRp.(Thr790Met)*        | 0.91 | 0.00 | 85.00 | 146.00 | 0.58 |
| 1800 | P  | EGFRp.(Glu746_Ala750del)* | 0.92 | 0.00 | 7.38  | 16.50  | 0.45 |
| 2464 | P  | EGFRp.(Thr790Met)*        | 1.20 | 0.00 | 85.00 | 150.00 | 0.57 |
| 2455 | DI | EGFRp.(Ile744.)           | 1.40 | 0.00 | 16.87 | 34.80  | 0.48 |

**Table S3.** CfDNA molecular profiling of samples with discordance findings in custom-validated NGS and Plasma-SeqSensei™ NSCLC IVDR assays of other targeted genes. Status: (DI: at diagnosis; P: during progression; ND: Non Determined). The color gradient shows the Mutated Allelic Frequency (MAF): (Red: absence of alteration (MAF =0%); darker blue shows higher MAF levels).

| ID Samples | Status<br>(DI: at diagnosis;<br>P: during progres-<br>sion; ND: un-<br>known) | Alteration                | MAF %<br>custom-validated<br>NGS assay | MAF %<br>Plasma-Se-<br>qSensei™ SOLID<br>CANCER IVD kit | CfDNA input [ng<br>input] of<br>Plasma-Se-<br>qSensei™ SOLID<br>CANCER IVD kit | CfDNA content<br>[ng input] cus-<br>tom-validated<br>NGS assay | Ratio of cfDNA content [ng input]<br>of Plasma-SeqSensei™ SOLID CAN-<br>CER IVD kit /cfDNA content [ng in-<br>put]custom-validated NGS assay |
|------------|-------------------------------------------------------------------------------|---------------------------|----------------------------------------|---------------------------------------------------------|--------------------------------------------------------------------------------|----------------------------------------------------------------|----------------------------------------------------------------------------------------------------------------------------------------------|
| 2934       | P                                                                             | TP53p.(Val172Phe)         | 0.40                                   | 0.00                                                    | 20.00                                                                          | 20.50                                                          | 0.98                                                                                                                                         |
| 2018       | P                                                                             | TP53p.(Arg175His)         | 0.80                                   | 0.00                                                    | 37.50                                                                          | 61.00                                                          | 0.61                                                                                                                                         |
| 1529       | DI                                                                            | ARID1Ap.(Thr1888Valfs*36) | 1.30                                   | 0.00                                                    | 36.81                                                                          | 50.00                                                          | 0.74                                                                                                                                         |
| 2229       | DI                                                                            | TP53p.(Cys135Tyr)         | 1.40                                   | 0.00                                                    | 30.25                                                                          | 54.00                                                          | 0.56                                                                                                                                         |
| 2455       | DI                                                                            | METp.(?)                  | 1.50                                   | 0.00                                                    | 16.87                                                                          | 34.80                                                          | 0.48                                                                                                                                         |
| 1984       | P                                                                             | TP53p.(Arg248Trp)         | 1.50                                   | 0.00                                                    | 81.25                                                                          | 150.00                                                         | 0.54                                                                                                                                         |
| 2485       | P                                                                             | TP53p.(Arg248Trp)         | 1.60                                   | 0.00                                                    | 10.05                                                                          | 50.00                                                          | 0.20                                                                                                                                         |
| 2932       | DI                                                                            | TP53p.(Ile255del)         | 1.60                                   | 0.00                                                    | 36.25                                                                          | 75.00                                                          | 0.48                                                                                                                                         |
| 2919       | P                                                                             | TP53p.(Ile255Phe)         | 1.60                                   | 0.00                                                    | 36.81                                                                          | 59.70                                                          | 0.62                                                                                                                                         |
| 1608       | P                                                                             | TP53p.(Gln136*)           | 1.64                                   | 0.00                                                    | 36.81                                                                          | 50.00                                                          | 0.74                                                                                                                                         |
| 2909       | P                                                                             | TP53p.(Val157Phe)         | 1.80                                   | 0.00                                                    | 37.50                                                                          | 100.00                                                         | 0.38                                                                                                                                         |
| 1647       | P                                                                             | NRAS c.291-131_450+328del | 1.90                                   | 0.00                                                    | 16.75                                                                          | 31.00                                                          | 0.54                                                                                                                                         |
| 1862       | DI                                                                            | TP53p.(Trp91Glyfs*32)     | 2.44                                   | 0.00                                                    | 36.81                                                                          | 16.00                                                          | 2.30                                                                                                                                         |
| 2935       | DI                                                                            | TP53p.(Arg248Trp)         | 2.50                                   | 0.00                                                    | 25.00                                                                          | 30.40                                                          | 0.82                                                                                                                                         |
| 2019       | DI                                                                            | NRASp.(?)                 | 2.70                                   | 0.00                                                    | 14.63                                                                          | 25.50                                                          | 0.57                                                                                                                                         |
| 2275       | P                                                                             | TP53p.(Val274Ala)         | 2.80                                   | 0.00                                                    | 18.29                                                                          | 13.75                                                          | 1.33                                                                                                                                         |
| 2941       | DI                                                                            | TP53p.(Ser215Gly)         | 3.00                                   | 0.00                                                    | 16.75                                                                          | 28.30                                                          | 0.59                                                                                                                                         |
| 2893       | P                                                                             | NOTCH1p.(Pro2415del)      | 3.10                                   | 0.00                                                    | 33.99                                                                          | 26.80                                                          | 1.27                                                                                                                                         |
| 2030       | DI                                                                            | TP53p.(Cys176Phe)         | 3.20                                   | 0.00                                                    | 59.25                                                                          | 107.80                                                         | 0.55                                                                                                                                         |
| 2155       | DI                                                                            | TP53p.(Arg213*)           | 3.80                                   | 0.00                                                    | 36.88                                                                          | 107.50                                                         | 0.34                                                                                                                                         |
| 2103       | DI                                                                            | CTNNB1p.(Ala39_Ala43del)  | 4.30                                   | 0.00                                                    | 36.88                                                                          | 85.00                                                          | 0.43                                                                                                                                         |
| 1517       | ND                                                                            | TP53p.(Lys132Arg)         | 4.50                                   | 0.00                                                    | 36.81                                                                          | 50.00                                                          | 0.74                                                                                                                                         |
| 2931       | P                                                                             | TP53p.(Glu224*)           | 5.40                                   | 0.00                                                    | 36.25                                                                          | 57.70                                                          | 0.63                                                                                                                                         |
| 2455       | DI                                                                            | METp.(Leu1213Phe)         | 5.90                                   | 0.00                                                    | 16.87                                                                          | 34.80                                                          | 0.48                                                                                                                                         |

|      |    |                                    |       |      |       |        |      |
|------|----|------------------------------------|-------|------|-------|--------|------|
| 2053 | P  | TP53p.(Arg110Leu)                  | 6.10  | 0.00 | 17.50 | 44.20  | 0.40 |
| 1606 | P  | TP53p.(Gln375*)                    | 6.54  | 0.00 | 36.81 | 50.00  | 0.74 |
| 2919 | P  | GNASp.(Arg201His)                  | 7.90  | 0.00 | 36.81 | 59.70  | 0.62 |
| 2472 | P  | TP53p.(?)                          | 8.10  | 0.00 | 85.00 | 93.00  | 0.91 |
| 2921 | P  | TP53p.(Gln331*)                    | 8.10  | 0.00 | 36.25 | 73.70  | 0.49 |
| 2941 | DI | TP53p.(Cys275Tyr)                  | 9.10  | 0.00 | 16.75 | 28.30  | 0.59 |
| 2155 | DI | TP53p.(Arg333Valfs*12)             | 9.20  | 0.00 | 36.88 | 107.50 | 0.34 |
| 2061 | P  | CDKN2Ap.(Ser56Argfs*56)            | 9.70  | 0.00 | 79.38 | 150.00 | 0.53 |
| 1901 | DI | TP53p.(Val147Glyfs*2)              | 9.90  | 0.00 | 81.25 | 150.00 | 0.54 |
| 1599 | DI | SMAD4p.(Trp302*)                   | 10.00 | 0.00 | 36.81 | 50.00  | 0.74 |
| 2455 | DI | TP53p.(Glu294Glyfs*12)             | 11.30 | 0.00 | 16.87 | 34.80  | 0.48 |
| 1845 | DI | TP53p.(Val272Leu)                  | 12.70 | 0.00 | 21.30 | 44.00  | 0.48 |
| 2937 | DI | H3F3Ap.(Ser29Thr)                  | 13.20 | 0.00 | 12.50 | 20.50  | 0.61 |
| 1614 | P  | ERBB4p.(Val391Ala)                 | 17.90 | 0.00 | 36.81 | 50.00  | 0.74 |
| 2338 | DI | TP53p.(Val173Leu)                  | 24.60 | 0.00 | 82.50 | 100.00 | 0.83 |
| 2915 | DI | TP53p.(His179Tyr)                  | 26.20 | 0.00 | 37.50 | 36.20  | 1.04 |
| 1619 | P  | ERBB2p.(Ile654_Ile655delinsValVal) | 35.60 | 0.00 | 36.81 | 50.00  | 0.74 |
| 1556 | ND | ERBB4p.(Val391Ala)                 | 37.10 | 0.00 | 36.81 | 50.00  | 0.74 |
| 2905 | P  | TP53p.(Arg158Pro)                  | 37.20 | 0.00 | 36.81 | 100.00 | 0.37 |
| 2929 | DI | TP53p.(Asn131del)                  | 38.70 | 0.00 | 36.25 | 100.00 | 0.36 |
| 1620 | ND | ERBB2p.(Ile654_Ile655delinsValVal) | 38.90 | 0.00 | 36.81 | 50.00  | 0.74 |
| 1606 | P  | METp.(Arg988Cys)                   | 46.77 | 0.00 | 36.81 | 50.00  | 0.74 |
| 1938 | ND | TP53p.(Arg273Cys)                  | 47.20 | 0.00 | 85.00 | 150.00 | 0.57 |
| 2061 | P  | TP53p.(Arg283Cys)                  | 56.50 | 0.00 | 79.38 | 150.00 | 0.53 |
| 1596 | p  | TP53p.(Lys132Arg)                  | 62.10 | 0.00 | 36.81 | 50.00  | 0.74 |

**Table S4.** Complete CfDNA molecular profiling of samples with the three assays. Status: (DI: at diagnosis; P: during progression; ND: Non Determined).

| ID Samples | Status | Date SafeSeq | Gene              | Alteration                | Plasma-SeqSensei™ SOLID CANCER IVD kit | MAF % Plasma-SeqSensei™ SOLID CANCER IVD kit | Plasma SeqSensei cfDNA input | Alteration Plasma OncoBEAM™ EGFR V2 | MAF % Plasma OncoBEAM™ EGFR V2 | BEAMING DNA content [ng input] | Alteration custom-validated NGS assay | MAF % custom-validated NGS assay | Sample DNA content [ng]NGS-SOPHIA |
|------------|--------|--------------|-------------------|---------------------------|----------------------------------------|----------------------------------------------|------------------------------|-------------------------------------|--------------------------------|--------------------------------|---------------------------------------|----------------------------------|-----------------------------------|
| 721        | P      | 28/07/2022   | Wild-type (WT)    | Wild-type (WT)            | WT                                     | 0.00                                         | 19.68                        | NR                                  | NR                             | NR                             | WT                                    | 0.00                             | 16.00                             |
| 1403       | P      | 20/07/2022   | Wild-type (WT)    | Wild-type (WT)            | WT                                     | 0.00                                         | 30.00                        | NR                                  | NR                             | NR                             | WT                                    | 0.00                             | 25.00                             |
| 1419       | P      | 04/07/2022   | EGFR              | EGFRp.(Leu858Arg)         | WT                                     | 0.00                                         | 25.00                        | EGFRp.(Leu858Arg)                   | 0.05                           | 18.28                          | WT                                    | 0.00                             | 50.00                             |
| 1430       | ND     | 20/07/2022   | Wild-type (WT)    | Wild-type (WT)            | WT                                     | 0.00                                         | 26.50                        | NR                                  | NR                             | NR                             | WT                                    | 0.00                             | 20.00                             |
| 1464       | DI     | 20/07/2022   | EGFR              | EGFRp.(Leu858Arg)         | EGFRp.(Leu858Arg)                      | 0.38                                         | 36.81                        | EGFRp.(Leu858Arg)                   | 0.11                           | 25.82                          | EGFRp.(Leu858Arg)                     | 0.43                             | 12.50                             |
| 1464       | DI     | 20/07/2022   | EGFR              | EGFRp.(Ala871Gly)         | EGFRp.(Ala871Gly)                      | 0.39                                         | 36.81                        | WT                                  | 0.00                           | 25.82                          | EGFRp.(Ala871Gly)                     | 0.42                             | 12.50                             |
| 1480       | P      | 04/07/2022   | Wild-type (WT)    | Wild-type (WT)            | WT                                     | 0.00                                         | 36.81                        | NR                                  | NR                             | NR                             | WT                                    | 0.00                             | 50.00                             |
| 1500       | P      | 04/07/2022   | PIK3CA            | PIK3CAp.(Cys420Arg)       | WT                                     | 0.00                                         | 25.00                        | WT                                  | 0.00                           | 12.78                          | PIK3CAp.(Cys420Arg)                   | 24.00                            | 48.00                             |
| 1500       | P      | 04/07/2022   | EGFR              | EGFRp.(Thr790Met)         | EGFRp.(Thr790Met)                      | 8.48                                         | 25.00                        | EGFRp.(Thr790Met)                   | 3.98                           | 12.78                          | EGFRp.(Thr790Met)                     | 7.90                             | 48.00                             |
| 1500       | P      | 04/07/2022   | EGFR              | EGFRp.(Glu746_Ala750del)  | EGFRp.(Glu746_Ala750del)               | 12.78                                        | 25.00                        | EGFRp.(Glu746_Ala750del)            | 11.63                          | 12.78                          | EGFRp.(Glu746_Ala750del)              | 14.80                            | 48.00                             |
| 1503       | P      | 28/07/2022   | Wild-type (WT)    | Wild-type (WT)            | WT                                     | 0.00                                         | 13.65                        | WT                                  | 0.00                           | 14.90                          | WT                                    | 0.00                             | 35.00                             |
| 1511       | P      | 04/07/2022   | EGFR              | EGFRp.(Glu746_Ala750del)  | WT                                     | 0.00                                         | 16.75                        | EGFRp.(Glu746_Ala750del)            | 0.08                           | 8.20                           | WT                                    | 0.00                             | 27.00                             |
| 1512       | P      | 28/07/2022   | Wild-type (WT)    | Wild-type (WT)            | WT                                     | 0.00                                         | 7.41                         | WT                                  | 0.00                           | 7.04                           | WT                                    | 0.00                             | 20.00                             |
| 1517       | ND     | 04/07/2022   | Other alterations | TP53p.(Lys132Arg)         | WT                                     | 0.00                                         | 36.81                        | WT                                  | 0.00                           | 32.66                          | TP53p.(Lys132Arg)                     | 4.50                             | 50.00                             |
| 1517       | ND     | 04/07/2022   | EGFR              | EGFRp.(Val834Leu)         | WT                                     | 0.00                                         | 36.81                        | WT                                  | 0.00                           | 32.66                          | EGFRp.(Val834Leu)                     | 14.40                            | 50.00                             |
| 1517       | ND     | 04/07/2022   | EGFR              | EGFRp.(Leu858Arg)         | EGFRp.(Leu858Arg)                      | 13.22                                        | 36.81                        | EGFRp.(Leu858Arg)                   | 5.99                           | 32.66                          | EGFRp.(Leu858Arg)                     | 15.60                            | 50.00                             |
| 1518       | P      | 04/07/2022   | EGFR              | EGFRp.(Leu858Arg)         | EGFRp.(Leu858Arg)                      | 0.26                                         | 36.81                        | EGFRp.(Leu858Arg)                   | 0.13                           | 41.55                          | EGFRp.(Leu858Arg)                     | 0.70                             | 50.00                             |
| 1519       | P      | 04/07/2022   | EGFR              | EGFRp.(Thr790Met)         | WT                                     | 0.00                                         | 25.00                        | EGFRp.(Thr790Met)                   | 0.04                           | 13.81                          | WT                                    | 0.00                             | 35.00                             |
| 1519       | P      | 04/07/2022   | EGFR              | EGFRp.(Glu746_Ala750del)  | WT                                     | 0.00                                         | 25.00                        | EGFRp.(Glu746_Ala750del)            | 0.15                           | 13.81                          | WT                                    | 0.00                             | 35.00                             |
| 1525       | P      | 03/08/2022   | Wild-type (WT)    | Wild-type (WT)            | WT                                     | 0.00                                         | 2.10                         | WT                                  | 0.00                           | 6.65                           | WT                                    | 0.00                             | 12.00                             |
| 1528       | DI     | 04/07/2022   | EGFR              | EGFRp.(Leu861Gln)         | EGFRp.(Leu861Gln)                      | 5.58                                         | 16.75                        | EGFRp.(Leu861Gln)                   | 3.23                           | 8.31                           | EGFRp.(Leu861Gln)                     | 8.10                             | 30.00                             |
| 1529       | DI     | 04/07/2022   | Other alterations | ARID1Ap.(Thr1888Valfs*36) | WT                                     | 0.00                                         | 36.81                        | WT                                  | 0.00                           | 11.47                          | ARID1Ap.(Thr1888Valfs*36)             | 1.30                             | 50.00                             |
| 1529       | DI     | 04/07/2022   | EGFR              | EGFRp.(Leu858Arg)         | EGFRp.(Leu858Arg)                      | 1.50                                         | 36.81                        | EGFRp.(Leu858Arg)                   | 0.88                           | 11.47                          | EGFRp.(Leu858Arg)                     | 2.40                             | 50.00                             |
| 1533       | P      | 04/07/2022   | EGFR              | EGFRp.(Glu746_Ala750del)  | EGFRp.(Glu746_Ala750del)               | 1.69                                         | 20.00                        | EGFRp.(Glu746_Ala750del)            | 1.40                           | 7.15                           | EGFRp.(Glu746_Ala750del)              | 1.60                             | 35.00                             |
| 1534       | DI     | 20/07/2022   | Wild-type (WT)    | Wild-type (WT)            | WT                                     | 0.00                                         | 9.35                         | WT                                  | 0.00                           | 4.19                           | WT                                    | 0.00                             | 15.00                             |
| 1546       | p      | 04/07/2022   | EGFR              | EGFRp.(Glu746_Ala750del)  | EGFRp.(Glu746_Ala750del)               | 1.45                                         | 10.63                        | EGFRp.(Glu746_Ala750del)            | 1.63                           | 10.29                          | EGFRp.(Glu746_Ala750del)              | 1.20                             | 15.00                             |
| 1547       | P      | 04/07/2022   | EGFR              | EGFRp.(Gly719Ala)         | EGFRp.(Gly719Ala)                      | 0.48                                         | 20.00                        | EGFRp.(Gly719X)                     | 0.45                           | 18.00                          | EGFRp.(Gly719Ala)                     | 1.00                             | 30.00                             |
| 1556       | ND     | 04/07/2022   | Other alterations | ERBB4p.(Val391Ala)        | WT                                     | 0.00                                         | 36.81                        | WT                                  | 0.00                           | 21.76                          | ERBB4p.(Val391Ala)                    | 37.10                            | 50.00                             |
| 1562       | ND     | 04/07/2022   | EGFR              | EGFRp.(Leu858Arg)         | EGFRp.(Leu858Arg)                      | 0.35                                         | 25.00                        | EGFRp.(Leu858Arg)                   | 0.36                           | 5.35                           | EGFRp.(Leu858Arg)                     | 1.10                             | 50.00                             |
| 1564       | DI     | 04/07/2022   | KRAS              | KRASp.(Gly12Cys)          | KRASp.(Gly12Cys)                       | 10.23                                        | 36.81                        | WT                                  | 0.00                           | 8.51                           | KRASp.(Gly12Cys)                      | 13.00                            | 50.00                             |
| 1571       | DI     | 13/07/2022   | EGFR              | EGFRp.(Leu858Arg)         | EGFRp.(Leu858Arg)                      | 0.80                                         | 23.36                        | EGFRp.(Leu858Arg)                   | 0.41                           | 12.41                          | EGFRp.(Leu858Arg)                     | 0.90                             | 35.00                             |
| 1572       | DI     | 13/07/2022   | Wild-type (WT)    | Wild-type (WT)            | WT                                     | 0.00                                         | 36.81                        | WT                                  | 0.00                           | 25.79                          | WT                                    | 0.00                             | 50.00                             |
| 1574       | P      | 01/08/2022   | Wild-type (WT)    | Wild-type (WT)            | WT                                     | 0.00                                         | 3.93                         | WT                                  | 0.00                           | 6.44                           | WT                                    | 0.00                             | 15.00                             |
| 1577       | P      | 13/07/2022   | EGFR              | EGFRp.(Glu746_Ala750del)  | EGFRp.(Glu746_Ala750del)               | 0.27                                         | 16.01                        | EGFRp.(Glu746_Ala750del)            | 0.26                           | 7.21                           | EGFRp.(Glu746_Ala750del)              | 16.60                            | 26.00                             |
| 1578       | DI     | 13/07/2022   | EGFR              | EGFRp.(Leu858Arg)         | EGFRp.(Leu858Arg)                      | 0.34                                         | 36.81                        | EGFRp.(Leu858Arg)                   | 0.19                           | 26.92                          | EGFRp.(Leu858Arg)                     | 0.40                             | 50.00                             |
| 1579       | DI     | 13/07/2022   | KRAS              | KRASp.(Gly12Cys)          | KRASp.(Gly12Cys)                       | 35.81                                        | 36.81                        | WT                                  | 0.00                           | 157.20                         | KRASp.(Gly12Cys)                      | 38.00                            | 50.00                             |
| 1592       | P      | 28/07/2022   | Wild-type (WT)    | Wild-type (WT)            | WT                                     | 0.00                                         | 7.65                         | WT                                  | 0.00                           | 7.04                           | WT                                    | 0.00                             | 17.00                             |
| 1594       | P      | 13/07/2022   | EGFR              | EGFRp.(Thr790Met)         | WT                                     | 0.00                                         | 20.00                        | EGFRp.(Thr790Met)                   | 0.14                           | 12.54                          | WT                                    | 0.00                             | 30.00                             |
| 1594       | P      | 13/07/2022   | EGFR              | EGFRp.(Leu858Arg)         | EGFRp.(Leu858Arg)                      | 0.28                                         | 20.00                        | EGFRp.(Leu858Arg)                   | 0.09                           | 12.54                          | WT                                    | 0.00                             | 30.00                             |
| 1596       | p      | 13/07/2022   | Other alterations | TP53p.(Lys132Arg)         | WT                                     | 0.00                                         | 36.81                        | NR                                  | 0.00                           | 155.03                         | TP53p.(Lys132Arg)                     | 62.10                            | 50.00                             |
| 1596       | p      | 13/07/2022   | EGFR              | EGFRp.(Val834Leu)         | WT                                     | 0.00                                         | 36.81                        | WT                                  | 0.00                           | 155.03                         | EGFRp.(Val834Leu)                     | 63.80                            | 50.00                             |
| 1596       | p      | 13/07/2022   | EGFR              | EGFRp.(Thr790Met)         | EGFRp.(Thr790Met)                      | 1.94                                         | 36.81                        | EGFRp.(Thr790Met)                   | 1.02                           | 155.03                         | EGFRp.(Thr790Met)                     | 1.50                             | 50.00                             |
| 1596       | p      | 13/07/2022   | EGFR              | EGFRp.(Leu858Arg)         | EGFRp.(Leu858Arg)                      | 56.19                                        | 36.81                        | EGFRp.(Leu858Arg)                   | 40.11                          | 155.03                         | EGFRp.(Leu858Arg)                     | 61.60                            | 50.00                             |
| 1597       | DI     | 20/07/2022   | Wild-type (WT)    | Wild-type (WT)            | WT                                     | 0.00                                         | 18.75                        | WT                                  | 0.00                           | 14.84                          | WT                                    | 0.00                             | 36.00                             |
| 1599       | DI     | 20/07/2022   | Other alterations | SMAD4p.(Trp302*)          | WT                                     | 0.00                                         | 36.81                        | WT                                  | 0.00                           | 71.17                          | SMAD4p.(Trp302*)                      | 10.00                            | 50.00                             |
| 1600       | ND     | 13/07/2022   | EGFR              | EGFRp.(Thr790Met)         | EGFRp.(Thr790Met)                      | 0.70                                         | 25.00                        | EGFRp.(Thr790Met)                   | 0.58                           | 14.52                          | EGFRp.(Thr790Met)                     | 0.50                             | 35.00                             |
| 1600       | ND     | 13/07/2022   | EGFR              | EGFRp.(Leu861Gln)         | EGFRp.(Leu861Gln)                      | 1.69                                         | 25.00                        | EGFRp.(Leu861Gln)                   | 1.73                           | 14.52                          | EGFRp.(Leu861Gln)                     | 1.80                             | 35.00                             |
| 1601       | P      | 13/07/2022   | EGFR              | EGFRp.(Thr790Met)         | EGFRp.(Thr790Met)                      | 0.37                                         | 25.00                        | EGFRp.(Thr790Met)                   | 0.06                           | 16.50                          | WT                                    | 0.00                             | 35.00                             |

|      |    |            |                   |                                     |                                 |       |       |                          |       |         |                                     |       |        |
|------|----|------------|-------------------|-------------------------------------|---------------------------------|-------|-------|--------------------------|-------|---------|-------------------------------------|-------|--------|
| 1603 | ND | 13/07/2022 | EGFR              | EGFRp.(Leu858Arg)                   | EGFRp.(Leu858Arg)               | 1.13  | 14.14 | EGFRp.(Leu858Arg)        | 0.74  | 11.05   | EGFRp.(Leu858Arg)                   | 1.46  | 23.00  |
| 1603 | ND | 13/07/2022 | EGFR              | EGFRp.(Ser768Ile)                   | EGFRp.(Ser768Ile)               | 1.21  | 14.14 | WT                       | 0.00  | 11.05   | EGFRp.(Ser768Ile)                   | 1.41  | 23.00  |
| 1606 | P  | 20/07/2022 | Other alterations | TP53p.(Gln375*)                     | WT                              | 0.00  | 36.81 | NR                       | NR    | NR      | TP53p.(Gln375*)                     | 6.54  | 50.00  |
| 1606 | P  | 20/07/2022 | Other alterations | METp.(Arg988Cys)                    | WT                              | 0.00  | 36.81 | NR                       | NR    | NR      | METp.(Arg988Cys)                    | 46.77 | 50.00  |
| 1606 | P  | 20/07/2022 | EGFR              | EGFRp.(Leu747Ser)                   | EGFRp.(Leu747Ser)               | 3.37  | 36.81 | NR                       | NR    | NR      | EGFRp.(Leu747Ser)                   | 8.41  | 50.00  |
| 1608 | P  | 13/07/2022 | Other alterations | TP53p.(Gln136*)                     | WT                              | 0.00  | 36.81 | WT                       | 0.00  | 58.29   | TP53p.(Gln136*)                     | 1.64  | 50.00  |
| 1608 | P  | 13/07/2022 | EGFR              | EGFRp.(Leu858Arg)                   | EGFRp.(Leu858Arg)               | 1.20  | 36.81 | EGFRp.(Leu858Arg)        | 0.78  | 58.29   | EGFRp.(Leu858Arg)                   | 1.06  | 50.00  |
| 1614 | P  | 13/07/2022 | Other alterations | ERBB4p.(Val391Ala)                  | WT                              | 0.00  | 36.81 | WT                       | 0.00  | 21.80   | ERBB4p.(Val391Ala)                  | 17.90 | 50.00  |
| 1619 | P  | 28/07/2022 | Other alterations | ERBB2p.(Ile654_Ile655de-linsValVal) | WT                              | 0.00  | 36.81 | WT                       | 0.00  | 61.15   | ERBB2p.(Ile654_Ile655de-linsValVal) | 35.60 | 50.00  |
| 1620 | ND | 13/07/2022 | Other alterations | ERBB2p.(Ile654_Ile655de-linsValVal) | WT                              | 0.00  | 36.81 | WT                       | 0.00  | 68.33   | ERBB2p.(Ile654_Ile655de-linsValVal) | 38.90 | 50.00  |
| 1620 | ND | 13/07/2022 | EGFR              | EGFRp.(Thr790Met)                   | EGFRp.(Thr790Met)               | 6.59  | 36.81 | EGFRp.(Thr790Met)        | 3.45  | 68.33   | EGFRp.(Thr790Met)                   | 5.10  | 50.00  |
| 1620 | ND | 13/07/2022 | EGFR              | EGFRp.(Leu858Arg)                   | EGFRp.(Leu858Arg)               | 14.14 | 36.81 | EGFRp.(Leu858Arg)        | 9.53  | 68.33   | EGFRp.(Leu858Arg)                   | 11.90 | 50.00  |
| 1622 | P  | 13/07/2022 | EGFR              | EGFRp.(Leu858Arg)                   | WT                              | 0.00  | 16.64 | EGFRp.(Leu858Arg)        | 0.06  | 9.49    | WT                                  | 0.00  | 50.00  |
| 1635 | P  | 13/07/2022 | EGFR              | EGFRp.(Leu861Gln)                   | EGFRp.(Leu861Gln)               | 1.69  | 11.77 | EGFRp.(Leu861Gln)        | 0.27  | 11.69   | EGFRp.(Leu861Gln)                   | 1.20  | 23.70  |
| 1647 | P  | 18/07/2022 | Other alterations | NRAS c.291-131_450+328del           | WT                              | 0.00  | 16.75 | WT                       | 0.00  | 11.71   | NRAS c.291-131_450+328del           | 1.90  | 31.00  |
| 1647 | P  | 18/07/2022 | EGFR              | EGFRp.(Glu746_Ala750del)            | EGFRp.(Glu746_Ala750del)        | 0.45  | 16.75 | EGFRp.(Glu746_Ala750del) | 0.30  | 11.71   | NR                                  | NR    | 31.00  |
| 1660 | P  | 01/08/2022 | Wild-type (WT)    | Wild-type (WT)                      | WT                              | 0.00  | 2.55  | WT                       | 0.00  | 5.89    | WT                                  | 0.00  | 11.75  |
| 1709 | P  | 01/08/2022 | Wild-type (WT)    | Wild-type (WT)                      | WT                              | 0.00  | 3.69  | WT                       | 0.00  | 4.49    | WT                                  | 0.00  | 15.00  |
| 1740 | P  | 18/07/2022 | EGFR              | EGFRp.(Leu858Arg)                   | EGFRp.(Leu858Arg)               | 0.19  | 25.00 | EGFRp.(Leu858Arg)        | 0.07  | 17.80   | WT                                  | 0.00  | 50.00  |
| 1774 | DI | 14/05/2021 | KRAS              | KRASp.(Gly12Cys)                    | KRASp.(Gly12Cys)                | 5.30  | 50.00 | NR                       | NR    | NR      | KRASp.(Gly12Cys)                    | 4.90  | 50.00  |
| 1777 | DI | 14/05/2021 | EGFR              | EGFRp.(Glu746_Ala750del)            | EGFRp.(Glu746_Ala750del)        | 1.93  | 36.87 | NR                       | NR    | NR      | EGFRp.(Glu746_Ala750del)            | 2.30  | 43.00  |
| 1800 | P  | 18/07/2022 | EGFR              | EGFRp.(Glu746_Ala750del)            | EGFRp.(Glu746_Ala750del)        | 0.92  | 7.38  | EGFRp.(Glu746_Ala750del) | 0.58  | 10.24   | WT                                  | 0.00  | 16.50  |
| 1814 | P  | 03/06/2021 | EGFR              | EGFRp.(Thr790Met)                   | WT                              | 0.00  | 31.25 | EGFRp.(Thr790Met)        | 0.05  | 20.35   | NR                                  | NR    | NR     |
| 1814 | P  | 03/06/2021 | EGFR              | EGFRp.(Leu861Gln)                   | EGFRp.(Leu861Gln)               | 0.22  | 31.25 | EGFRp.(Leu861Gln)        | 0.06  | 20.35   | NR                                  | NR    | NR     |
| 1827 | P  | 17/08/2022 | EGFR              | EGFRp.(Glu746_Ala750del)            | WT                              | 0.00  | 6.29  | EGFRp.(Glu746_Ala750del) | 0.05  | 6.23    | WT                                  | 0.00  | 15.10  |
| 1830 | P  | 18/07/2022 | EGFR              | EGFRp.(Leu858Arg)                   | EGFRp.(Leu858Arg)               | 0.02  | 36.81 | EGFRp.(Leu858Arg)        | 0.04  | 32.85   | WT                                  | 0.00  | 50.00  |
| 1835 | DI | 14/05/2021 | KRAS              | KRASp.(Gly12Asp)                    | KRASp.(Gly12Asp)                | 21.17 | 75.00 | WT                       | 0.00  | 56.59   | KRASp.(Gly12Asp)                    | 21.40 | 50.00  |
| 1843 | DI | 14/05/2021 | EGFR              | EGFRp.(Leu62Arg)                    | WT                              | 0.00  | 81.25 | WT                       | 0.00  | 42.14   | EGFRp.(Leu62Arg)                    | 1.90  | 50.00  |
| 1843 | DI | 14/05/2021 | EGFR              | EGFRp.(Leu858Arg)                   | EGFRp.(Leu858Arg)               | 2.78  | 81.25 | EGFRp.(Leu858Arg)        | 1.34  | 42.14   | EGFRp.(Leu858Arg)                   | 2.30  | 50.00  |
| 1845 | DI | 02/08/2021 | PIK3CA            | PIK3CAp.(Arg88Gln)                  | WT                              | 0.00  | 21.30 | WT                       | 0.00  | 18.44   | PIK3CAp.(Arg88Gln)                  | 7.40  | 44.00  |
| 1845 | DI | 02/08/2021 | Other alterations | TP53p.(Val272Leu)                   | WT                              | 0.00  | 21.30 | NR                       | 0.00  | 18.44   | TP53p.(Val272Leu)                   | 12.70 | 44.00  |
| 1845 | DI | 02/08/2021 | KRAS              | KRASp.(Gly12Asp)                    | KRASp.(Gly12Asp)                | 10.48 | 21.30 | WT                       | 0.00  | 18.44   | KRASp.(Gly12Asp)                    | 14.00 | 44.00  |
| 1846 | DI | 14/05/2021 | EGFR              | EGFRp.(Glu746_Ala750del)            | EGFRp.(Glu746_Ala750del)        | 2.73  | 81.25 | EGFRp.(Glu746_Ala750del) | 2.69  | 25.20   | EGFRp.(Glu746_Ala750del)            | 2.80  | 50.00  |
| 1862 | DI | 20/07/2022 | Other alterations | TP53p.(Trp91Glyfs*32)               | WT                              | 0.00  | 36.81 | WT                       | 0.00  | 17.34   | TP53p.(Trp91Glyfs*32)               | 2.44  | 16.00  |
| 1867 | DI | 14/05/2021 | EGFR              | EGFRp.(Leu858Arg)                   | EGFRp.(Leu858Arg)               | 0.18  | 56.75 | EGFRp.(Leu858Arg)        | 0.27  | 36.07   | EGFRp.(Leu858Arg)                   | 0.70  | 50.00  |
| 1870 | DI | 14/05/2021 | KRAS              | KRASp.(Gly12Asp)                    | KRASp.(Gly12Asp)                | 19.50 | 81.25 | WT                       | 0.00  | 72.92   | KRASp.(Gly12Asp)                    | 17.00 | 50.00  |
| 1876 | DI | 20/07/2022 | Wild-type (WT)    | Wild-type (WT)                      | WT                              | 0.00  | 36.81 | WT                       | 0.00  | 24.89   | WT                                  | 0.00  | 66.00  |
| 1881 | DI | 14/05/2021 | EGFR              | EGFRp.(Leu858Arg)                   | WT                              | 0.00  | 81.25 | EGFRp.(Leu858Arg)        | 0.02  | 108.45  | WT                                  | 0.00  | 50.00  |
| 1887 | P  | 14/05/2021 | EGFR              | EGFRp.(Ala767_Val769dup)            | EGFRp.(Ala767_Val769dup)        | 4.13  | 31.25 | WT                       | 0.00  | 25.35   | EGFRp.(Ala767_Val769dup)            | 5.60  | 75.00  |
| 1889 | P  | 02/08/2021 | EGFR              | EGFRp.(Cys797Ser)                   | EGFRp.(Cys797Ser)               | 4.12  | 25.00 | EGFRp.(Cys797Ser)        | 4.83  | 22.43   | EGFRp.(Cys797Ser)                   | 6.30  | 40.80  |
| 1889 | P  | 02/08/2021 | EGFR              | EGFRp.(Thr790Met)                   | EGFRp.(Thr790Met)               | 20.30 | 25.00 | EGFRp.(Thr790Met)        | 9.36  | 22.43   | EGFRp.(Thr790Met)                   | 20.60 | 40.80  |
| 1889 | P  | 02/08/2021 | EGFR              | EGFRp.(Leu747_Ala750de-linsPro)     | EGFRp.(Leu747_Ala750de-linsPro) | 45.70 | 25.00 | EGFRp.(Glu746_Ala750del) | 23.65 | 22.43   | EGFRp.(Leu747_Ala750de-linsPro)     | 45.70 | 40.80  |
| 1892 | P  | 02/08/2021 | EGFR              | EGFRp.(Leu861Gln)                   | EGFRp.(Leu861Gln)               | 2.04  | 10.63 | EGFRp.(Leu861Gln)        | 0.82  | 9.88    | EGFRp.(Leu861Gln)                   | 1.60  | 16.00  |
| 1895 | DI | 14/05/2021 | PIK3CA            | PIK3CAp.(Glu545Lys)                 | PIK3CAp.(Glu545Lys)             | 15.14 | 43.75 | WT                       | 0.00  | 48.71   | PIK3CAp.(Glu545Lys)                 | 1.40  | 102.30 |
| 1901 | DI | 14/05/2021 | Other alterations | TP53p.(Val147Glyfs*2)               | WT                              | 0.00  | 81.25 | WT                       | 0.00  | 96.99   | TP53p.(Val147Glyfs*2)               | 9.90  | 150.00 |
| 1901 | DI | 14/05/2021 | KRAS              | KRASp.(Gly12Asp)                    | KRASp.(Gly12Asp)                | 45.73 | 81.25 | WT                       | 0.00  | 96.99   | KRASp.(Gly12Asp)                    | 44.70 | 150.00 |
| 1905 | DI | 20/07/2022 | Wild-type (WT)    | Wild-type (WT)                      | WT                              | 0.00  | 36.81 | WT                       | 0.00  | 76.42   | WT                                  | 0.00  | 150.00 |
| 1913 | P  | 01/08/2022 | Wild-type (WT)    | Wild-type (WT)                      | WT                              | 0.00  | 4.95  | WT                       | 0.00  | 7.40    | WT                                  | 0.00  | 11.15  |
| 1938 | ND | 02/08/2021 | Other alterations | TP53p.(Arg273Cys)                   | WT                              | 0.00  | 85.00 | WT                       | 0.00  | 5164.75 | TP53p.(Arg273Cys)                   | 47.20 | 150.00 |
| 1938 | ND | 02/08/2021 | PIK3CA            | PIK3CAp.(p.His1047Arg)              | PIK3CAp.(p.His1047Arg)          | 0.06  | 85.00 | WT                       | 0.00  | 5164.75 | WT                                  | 0.00  | 150.00 |



|      |    |            |                   |                                 |                                  |       |       |                          |       |         |                                  |       |        |
|------|----|------------|-------------------|---------------------------------|----------------------------------|-------|-------|--------------------------|-------|---------|----------------------------------|-------|--------|
| 1938 | ND | 02/08/2021 | PIK3CA            | PIK3Cap.(Glu545Lys)             | PIK3Cap.(Glu545Lys)              | 13.95 | 85.00 | WT                       | 0.00  | 5164.75 | PIK3Cap.(Glu545Lys)              | 13.80 | 150.00 |
| 1938 | ND | 02/08/2021 | EGFR              | EGFRp.(Glu746_Thr751de-linsVal) | EG-FRr.(Glu746_Thr751de-linsVal) | 40.35 | 85.00 | EGFRp.(Glu746_Ala750del) | 37.57 | 5164.75 | EG-FRr.(Glu746_Thr751de-linsVal) | 38.90 | 150.00 |
| 1962 | DI | 20/07/2022 | PIK3CA            | PIK3Cap.(Glu418Lys)             | WT                               | 0.00  | 36.81 | WT                       | 0.00  | 110.80  | PIK3Cap.(Glu418Lys)              | 3.60  | 150.00 |
| 1962 | DI | 20/07/2022 | PIK3CA            | PIK3Cap.(Glu545Gln)             | PIK3Cap.(Glu545Gln)              | 1.14  | 36.81 | WT                       | 0.00  | 110.80  | PIK3Cap.(Glu545Gln)              | 2.20  | 150.00 |
| 1962 | DI | 20/07/2022 | EGFR              | EGFRp.(Leu858Arg)               | EGFRp.(Leu858Arg)                | 29.44 | 36.81 | EGFRp.(Leu858Arg)        | 19.93 | 110.80  | EGFRp.(Leu858Arg)                | 34.30 | 150.00 |
| 1966 | DI | 20/07/2022 | PIK3CA            | PIK3CA(p.E545Q)                 | PIK3CA(p.E545Q)                  | 0.21  | 36.81 | WT                       | 0.00  | 120.89  | WT                               | 0.00  | 150.00 |
| 1966 | DI | 20/07/2022 | EGFR              | EGFRp.(Leu858Arg)               | EGFRp.(Leu858Arg)                | 14.70 | 36.81 | EGFRp.(Leu858Arg)        | 10.18 | 120.89  | EGFRp.(Leu858Arg)                | 15.80 | 150.00 |
| 1979 | DI | 20/07/2022 | Wild-type (WT)    | Wild-type (WT)                  | WT                               | 0.00  | 36.81 | WT                       | 0.00  | 259.47  | WT                               | 0.00  | 150.00 |
| 1984 | P  | 17/08/2022 | Other alterations | TP53p.(Arg248Trp)               | WT                               | 0.00  | 81.25 | WT                       | 0.00  | 65.16   | TP53p.(Arg248Trp)                | 1.50  | 150.00 |
| 1984 | P  | 17/08/2022 | EGFR              | EGFRp.(Thr790Met)               | EGFRp.(Thr790Met)                | 0.51  | 81.25 | EGFRp.(Thr790Met)        | 0.34  | 65.16   | EGFRp.(Thr790Met)                | 0.52  | 150.00 |
| 1984 | P  | 17/08/2022 | EGFR              | EGFRp.(Leu858Arg)               | EGFRp.(Leu858Arg)                | 29.06 | 81.25 | EGFRp.(Leu858Arg)        | 19.38 | 65.16   | EGFRp.(Leu858Arg)                | 32.60 | 150.00 |
| 1993 | ND | 20/07/2022 | BRAF              | BRAFp.(Val600Glu)               | BRAFp.(Val600Glu)                | 2.49  | 21.56 | NR                       | NR    | NR      | BRAFp.(Val600Glu)                | 4.00  | 15.25  |
| 1997 | DI | 28/07/2022 | Wild-type (WT)    | Wild-type (WT)                  | WT                               | 0.00  | 9.09  | WT                       | 0.00  | 12.34   | WT                               | 0.00  | 24.25  |
| 2009 | DI | 02/08/2021 | KRAS              | KRASp.(Gly12Asp)                | KRASp.(Gly12Asp)                 | 0.50  | 85.00 | WT                       | 0.00  | 72.72   | KRASp.(Gly12Asp)                 | 0.50  | 150.00 |
| 2010 | DI | 28/07/2022 | KRAS              | KRAS(p.Gly12Cys)                | KRAS(p.Gly12Cys)                 | 0.08  | 36.81 | WT                       | 0.00  | 58.70   | WT                               | 0.00  | 117.50 |
| 2012 | ND | 20/07/2022 | Wild-type (WT)    | Wild-type (WT)                  | WT                               | 0.00  | 20.31 | NR                       | NR    | NR      | WT                               | 0.00  | 14.50  |
| 2017 | P  | 02/08/2021 | EGFR              | EGFRp.(Thr790Met)               | EGFRp.(Thr790Met)                | 0.91  | 85.00 | EGFRp.(Thr790Met)        | 0.51  | 84.47   | WT                               | 0.00  | 146.00 |
| 2017 | P  | 02/08/2021 | EGFR              | EGFRp.(Leu858Arg)               | EGFRp.(Leu858Arg)                | 1.33  | 85.00 | EGFRp.(Leu858Arg)        | 0.86  | 84.47   | EGFRp.(Leu858Arg)                | 1.60  | 146.00 |
| 2018 | P  | 03/06/2021 | EGFR              | EGFRp.(Thr790Met)               | WT                               | 0.00  | 37.50 | EGFRp.(Thr790Met)        | 0.03  | 21.59   | WT                               | 0.00  | 61.00  |
| 2018 | P  | 03/06/2021 | Other alterations | TP53p.(Arg175His)               | WT                               | 0.00  | 37.50 | WT                       | 0.00  | 21.59   | TP53p.(Arg175His)                | 0.80  | 61.00  |
| 2018 | P  | 03/06/2021 | EGFR              | EGFRp.(Leu861Gln)               | EGFRp.(Leu861Gln)                | 1.53  | 37.50 | EGFRp.(Leu861Gln)        | 1.29  | 21.59   | EGFRp.(Leu861Gln)                | 2.20  | 61.00  |
| 2019 | DI | 02/08/2021 | Other alterations | NRASp.(?)                       | WT                               | 0.00  | 14.63 | WT                       | 0.00  | 22.36   | NRASp.(?)                        | 2.70  | 25.50  |
| 2019 | DI | 02/08/2021 | BRAF              | BRAFp.(Val600Glu)               | BRAFp.(Val600Glu)                | 1.72  | 14.63 | WT                       | 0.00  | 22.36   | BRAFp.(Val600Glu)                | 1.40  | 25.50  |
| 2025 | P  | 03/06/2021 | EGFR              | EGFRp.(Val843Ile)               | WT                               | 0.00  | 10.31 | WT                       | 0.00  | 12.05   | EGFRp.(Val843Ile)                | 45.40 | 25.80  |
| 2030 | DI | 03/06/2021 | Other alterations | TP53p.(Cys176Phe)               | WT                               | 0.00  | 59.25 | NR                       | NR    | NR      | TP53p.(Cys176Phe)                | 3.20  | 107.80 |
| 2030 | DI | 03/06/2021 | KRAS              | KRASp.(Gly12Val)                | KRASp.(Gly12Val)                 | 6.10  | 59.25 | NR                       | NR    | NR      | KRASp.(Gly12Val)                 | 5.20  | 107.80 |
| 2032 | DI | 03/06/2021 | EGFR              | EGFRp.(Leu747_Glu749del)        | EG-FRr.(Glu746_Ala750del)        | 1.10  | 77.50 | NR                       | NR    | NR      | EG-FRr.(Leu747_Glu749del)        | 1.20  | 76.50  |
| 2036 | P  | 25/07/2022 | Wild-type (WT)    | Wild-type (WT)                  | WT                               | 0.00  | 36.88 | WT                       | 0.00  | 67.75   | WT                               | 0.00  | 150.00 |
| 2045 | P  | 03/06/2021 | EGFR              | EGFRp.(Thr790Met)               | WT                               | 0.00  | 5.89  | EGFRp.(Thr790Met)        | 0.05  | 9.35    | WT                               | 0.00  | 15.10  |
| 2045 | P  | 03/06/2021 | EGFR              | EGFRp.(Glu746_Ala750del)        | WT                               | 0.00  | 5.89  | EGFRp.(Glu746_Ala750del) | 0.05  | 9.35    | WT                               | 0.00  | 15.10  |
| 2053 | P  | 03/06/2021 | Other alterations | TP53p.(Arg110Leu)               | WT                               | 0.00  | 17.50 | WT                       | 0.00  | 42.70   | TP53p.(Arg110Leu)                | 6.10  | 44.20  |
| 2053 | P  | 03/06/2021 | EGFR              | EGFRp.(Gly719Ala)               | EGFRp.(Gly719Ala)                | 6.56  | 17.50 | EGFRp.(Gly719X)          | 4.05  | 42.70   | EGFRp.(Gly719Ala)                | 6.70  | 44.20  |
| 2061 | P  | 03/06/2021 | Other alterations | CDKN2Ap.(Ser56Argfs*56)         | WT                               | 0.00  | 79.38 | NR                       | NR    | NR      | CDKN2Ap.(Ser56Argfs*56)          | 9.70  | 150.00 |
| 2061 | P  | 03/06/2021 | Other alterations | TP53p.(Arg283Cys)               | WT                               | 0.00  | 79.38 | NR                       | NR    | NR      | TP53p.(Arg283Cys)                | 56.50 | 150.00 |
| 2061 | P  | 03/06/2021 | KRAS              | KRASp.(Gly12Cys)                | KRASp.(Gly12Cys)                 | 12.30 | 79.38 | NR                       | NR    | NR      | KRASp.(Gly12Cys)                 | 13.20 | 150.00 |
| 2066 | DI | 28/07/2022 | Wild-type (WT)    | Wild-type (WT)                  | WT                               | 0.00  | 18.84 | WT                       | 0.00  | 7.42    | WT                               | 0.00  | 10.00  |
| 2069 | P  | 02/08/2021 | EGFR              | EGFRp.(Thr790Met)               | EGFRp.(Thr790Met)                | 0.60  | 16.00 | EGFRp.(Thr790Met)        | 0.49  | 14.70   | EGFRp.(Thr790Met)                | 2.00  | 18.00  |
| 2069 | P  | 02/08/2021 | EGFR              | EGFRp.(Leu861Gln)               | EGFRp.(Leu861Gln)                | 9.67  | 16.00 | EGFRp.(Leu861Gln)        | 6.75  | 14.70   | EGFRp.(Leu861Gln)                | 18.70 | 18.00  |
| 2103 | DI | 25/07/2022 | Other alterations | CTNNB1p.(Ala39_Ala43del)        | WT                               | 0.00  | 36.88 | WT                       | 0.00  | 45.23   | CTNNB1p.(Ala39_Ala43del)         | 4.30  | 85.00  |
| 2103 | DI | 25/07/2022 | EGFR              | EGFRp.(Glu746_Ala750del)        | EG-FRr.(Glu746_Ala750del)        | 8.48  | 36.88 | EGFRp.(Glu746_Ala750del) | 7.63  | 45.23   | EG-FRr.(Glu746_Ala750del)        | 7.10  | 85.00  |
| 2105 | P  | 03/06/2021 | EGFR              | EGFRp.(Thr790Met)               | EGFRp.(Thr790Met)                | 0.17  | 35.81 | EGFRp.(Thr790Met)        | 0.16  | 33.09   | WT                               | 0.00  | 77.00  |
| 2105 | P  | 03/06/2021 | EGFR              | EGFRp.(Leu718Gln)               | EGFRp.(Leu718Gln)                | 0.18  | 35.81 | WT                       | 0.00  | 33.09   | WT                               | 0.00  | 77.00  |
| 2105 | P  | 03/06/2021 | EGFR              | EGFRp.(Leu858Arg)               | EGFRp.(Leu858Arg)                | 0.26  | 35.81 | EGFRp.(Leu858Arg)        | 0.22  | 33.09   | EGFRp.(Leu858Arg)                | 0.30  | 77.00  |
| 2151 | DI | 02/08/2021 | PIK3CA            | PIK3Cap.(Arg524Lys)             | WT                               | 0.00  | 11.56 | WT                       | 0.00  | 22.28   | PIK3Cap.(Arg524Lys)              | 1.40  | 35.00  |
| 2155 | DI | 25/07/2022 | Other alterations | TP53p.(Arg213*)                 | WT                               | 0.00  | 36.88 | WT                       | 0.00  | 48.53   | TP53p.(Arg213*)                  | 3.80  | 107.50 |
| 2155 | DI | 25/07/2022 | Other alterations | TP53p.(Arg333Valfs*12)          | WT                               | 0.00  | 36.88 | WT                       | 0.00  | 48.53   | TP53p.(Arg333Valfs*12)           | 9.20  | 107.50 |
| 2155 | DI | 25/07/2022 | EGFR              | EGFRp.(Leu858Arg)               | EGFRp.(Leu858Arg)                | 65.47 | 36.88 | EGFRp.(Leu858Arg)        | 45.22 | 48.53   | EGFRp.(Leu858Arg)                | 68.70 | 107.50 |
| 2160 | P  | 03/08/2022 | Wild-type (WT)    | Wild-type (WT)                  | WT                               | 0.00  | 16.20 | NR                       | NR    | NR      | WT                               | 0.00  | 46.20  |
| 2165 | P  | 28/07/2022 | Wild-type (WT)    | Wild-type (WT)                  | WT                               | 0.00  | 8.46  | WT                       | 0.00  | 4.51    | WT                               | 0.00  | 8.70   |
| 2181 | DI | 18/07/2022 | EGFR              | EGFRp.(Glu746_Ala750del)        | EG-FRr.(Glu746_Ala750del)        | 0.13  | 36.81 | EGFRp.(Glu746_Ala750del) | 0.10  | 88.20   | WT                               | 0.00  | 150.00 |
| 2224 | DI | 28/07/2022 | Wild-type (WT)    | Wild-type (WT)                  | WT                               | 0.00  | 20.64 | WT                       | 0.00  | 21.36   | WT                               | 0.00  | 35.00  |
| 2227 | DI | 28/07/2022 | Wild-type (WT)    | Wild-type (WT)                  | WT                               | 0.00  | 19.50 | WT                       | 0.00  | 17.28   | WT                               | 0.00  | 22.00  |
| 2229 | DI | 25/07/2022 | Other alterations | TP53p.(Cys135Tyr)               | WT                               | 0.00  | 30.25 | WT                       | 0.00  | 31.60   | TP53p.(Cys135Tyr)                | 1.40  | 54.00  |

|      |    |            |                   |                          |                               |       |       |                          |       |        |                               |       |        |
|------|----|------------|-------------------|--------------------------|-------------------------------|-------|-------|--------------------------|-------|--------|-------------------------------|-------|--------|
| 2229 | DI | 25/07/2022 | KRAS              | KRASp.(Gln61Arg)         | KRASp.(Gln61Arg)              | 0.25  | 30.25 | WT                       | 0.00  | 31.60  | WT                            | 0.00  | 54.00  |
| 2229 | DI | 25/07/2022 | EGFR              | EGFRp.(Leu858Arg)        | EGFRp.(Leu858Arg)             | 3.69  | 30.25 | EGFRp.(Leu858Arg)        | 2.25  | 31.60  | EGFRp.(Leu858Arg)             | 5.20  | 54.00  |
| 2230 | DI | 18/07/2022 | EGFR              | EGFRp.(Glu746_Ala750del) | EG-FR<br>p.(Glu746_Ala750del) | 0.07  | 36.81 | EGFRp.(Glu746_Ala750del) | 0.13  | 44.15  | WT                            | 0.00  | 72.00  |
| 2238 | DI | 25/07/2022 | Wild-type (WT)    | Wild-type (WT)           | WT                            | 0.00  | 36.88 | WT                       | 0.00  | 54.01  | WT                            | 0.00  | 74.80  |
| 2249 | P  | 25/07/2022 | Wild-type (WT)    | Wild-type (WT)           | WT                            | 0.00  | 33.90 | NR                       | NR    | NR     | WT                            | 0.00  | 28.30  |
| 2268 | ND | 03/06/2021 | EGFR              | EGFRp.(Ser768Ile)        | EGFRp.(Ser768Ile)             | 2.37  | 25.98 | WT                       | 0.00  | 46.31  | EGFRp.(Ser768Ile)             | 3.20  | 65.80  |
| 2268 | ND | 03/06/2021 | EGFR              | EGFRp.(Gly719Ser)        | EGFRp.(Gly719Ser)             | 2.55  | 25.98 | EGFRp.(Gly719X)          | 1.24  | 46.31  | EGFRp.(Gly719Ser)             | 3.40  | 65.80  |
| 2275 | P  | 18/07/2022 | Other alterations | TP53p.(Val274Ala)        | WT                            | 0.00  | 18.29 | NR                       | NR    | NR     | TP53p.(Val274Ala)             | 2.80  | 13.75  |
| 2275 | P  | 18/07/2022 | EGFR              | EGFRp.(Leu858Arg)        | EGFRp.(Leu858Arg)             | 2.04  | 18.29 | NR                       | NR    | NR     | EGFRp.(Leu858Arg)             | 3.40  | 13.75  |
| 2291 | DI | 25/07/2022 | Wild-type (WT)    | Wild-type (WT)           | WT                            | 0.00  | 34.29 | WT                       | 0.00  | 24.44  | WT                            | 0.00  | 11.10  |
| 2312 | ND | 25/07/2022 | Wild-type (WT)    | Wild-type (WT)           | WT                            | 0.00  | 30.30 | NR                       | NR    | NR     | WT                            | 0.00  | 25.20  |
| 2324 | DI | 18/07/2022 | EGFR              | EGFRp.(Glu746_Ala750del) | EG-FR<br>p.(Glu746_Ala750del) | 38.61 | 36.81 | EGFRp.(Glu746_Ala750del) | 36.44 | 328.54 | NR                            | NR    | NR     |
| 2325 | P  | 01/08/2022 | KRAS              | KRASp.(Met72Leu)         | KRASp.(Met72Leu)              | 0.55  | 15.45 | WT                       | 0.00  | 12.37  | KRASp.(Met72Leu)              | 1.10  | 19.00  |
| 2334 | P  | 03/06/2021 | EGFR              | EGFRp.(Cys797Ser)        | EGFRp.(Cys797Ser)             | 0.55  | 32.13 | EGFRp.(Cys797Ser)        | 0.26  | 14.81  | NR                            | NR    | NR     |
| 2334 | P  | 03/06/2021 | EGFR              | EGFRp.(Glu746_Ala750del) | EGFRp.L747_T751del            | 0.61  | 32.13 | EGFRp.(Glu746_Ala750del) | 0.66  | 14.81  | NR                            | NR    | NR     |
| 2334 | P  | 03/06/2021 | EGFR              | EGFRp.(Thr790Met)        | EGFRp.(Thr790Met)             | 1.02  | 32.13 | EGFRp.(Thr790Met)        | 0.52  | 14.81  | NR                            | NR    | NR     |
| 2336 | DI | 25/07/2022 | PIK3CA            | PIK3Cap.(Glu545Lys)      | PIK3Cap.(Glu545Lys)           | 27.58 | 36.88 | WT                       | 0.00  | 37.69  | PIK3Cap.(Glu545Lys)           | 29.30 | 100.00 |
| 2336 | DI | 25/07/2022 | EGFR              | EGFRp.(Glu746_Ala750del) | EG-FR<br>p.(Glu746_Ala750del) | 64.04 | 36.88 | EGFRp.(Glu746_Ala750del) | 60.41 | 37.69  | EG-FR<br>p.(Glu746_Ala750del) | 62.20 | 100.00 |
| 2338 | DI | 03/06/2021 | Other alterations | TP53p.(Val173Leu)        | WT                            | 0.00  | 82.50 | WT                       | 0.00  | 106.58 | TP53p.(Val173Leu)             | 24.60 | 100.00 |
| 2338 | DI | 03/06/2021 | EGFR              | EGFRp.(Gly779Cys)        | WT                            | 0.00  | 82.50 | WT                       | 0.00  | 106.58 | EGFRp.(Gly779Cys)             | 31.70 | 100.00 |
| 2338 | DI | 03/06/2021 | EGFR              | EGFRp.(Leu861Gln)        | EGFRp.(Leu861Gln)             | 29.04 | 82.50 | EGFRp.(Leu861Gln)        | 20.31 | 106.58 | EGFRp.(Leu861Gln)             | 31.50 | 100.00 |
| 2377 | P  | 18/07/2022 | EGFR              | EGFRp.(Glu746_Ala750del) | EG-FR<br>p.(Glu746_Ala750del) | 0.02  | 36.81 | EGFRp.(Glu746_Ala750del) | 0.03  | 36.43  | WT                            | 0.00  | 72.30  |
| 2379 | P  | 03/08/2022 | EGFR              | EGFRp.(Thr790Met)        | WT                            | 0.00  | 6.75  | EGFRp.(Thr790Met)        | 0.01  | 14.02  | WT                            | 0.00  | 25.80  |
| 2379 | P  | 03/08/2022 | EGFR              | EGFRp.(Glu746_Ala750del) | WT                            | 0.00  | 6.75  | EGFRp.(Glu746_Ala750del) | 0.05  | 14.02  | WT                            | 0.00  | 25.80  |
| 2387 | P  | 25/07/2022 | BRAF              | BRAFp.(Asp594Asn)        | WT                            | 0.00  | 36.88 | NR                       | NR    | NR     | BRAFp.(Asp594Asn)             | 1.50  | 37.50  |
| 2428 | P  | 17/08/2022 | EGFR              | EGFRp.(Leu718Gln)        | EGFRp.(Leu718Gln)             | 0.52  | 37.50 | WT                       | 0.00  | 91.04  | WT                            | 0.00  | 100.00 |
| 2428 | P  | 17/08/2022 | EGFR              | EGFRp.(Thr790Met)        | EGFRp.(Thr790Met)             | 0.83  | 37.50 | EGFRp.(Thr790Met)        | 0.49  | 91.04  | WT                            | 0.00  | 100.00 |
| 2428 | P  | 17/08/2022 | EGFR              | EGFRp.(Leu858Arg)        | EGFRp.(Leu858Arg)             | 1.41  | 37.50 | EGFRp.(Leu858Arg)        | 0.59  | 91.04  | EGFRp.(Leu858Arg)             | 1.60  | 100.00 |
| 2441 | DI | 24/08/2021 | KRAS              | KRASp.(Gly12Cys)         | WT                            | 0.00  | 3.44  | WT                       | 0.00  | 2.66   | KRASp.(Gly12Cys)              | 0.50  | 8.49   |
| 2452 | DI | 01/08/2022 | Wild-type (WT)    | Wild-type (WT)           | WT                            | 0.00  | 8.37  | WT                       | 0.00  | 18.63  | WT                            | 0.00  | 32.00  |
| 2453 | DI | 02/08/2021 | BRAF              | BRAFp.(Val600Glu)        | BRAFp.(Val600Glu)             | 0.59  | 6.24  | WT                       | 0.00  | 10.39  | BRAFp.(Val600Glu)             | 0.60  | 22.10  |
| 2454 | DI | 24/08/2021 | KRAS              | KRASp.(Gln61Leu)         | KRASp.(Gln61Leu)              | 58.96 | 36.25 | NR                       | NR    | NR     | KRASp.(Gln61Leu)              | 67.50 | 150.00 |
| 2455 | DI | 24/08/2021 | Other alterations | METp.(?)                 | WT                            | 0.00  | 16.87 | NR                       | 0.00  | 18.92  | METp.(?)                      | 1.50  | 34.80  |
| 2455 | DI | 24/08/2021 | Other alterations | METp.(Leu1213Phe)        | WT                            | 0.00  | 16.87 | WT                       | 0.00  | 18.92  | METp.(Leu1213Phe)             | 5.90  | 34.80  |
| 2455 | DI | 24/08/2021 | Other alterations | TP53p.(Glu294Glyfs*12)   | WT                            | 0.00  | 16.87 | WT                       | 0.00  | 18.92  | TP53p.(Glu294Glyfs*12)        | 11.30 | 34.80  |
| 2455 | DI | 24/08/2021 | EGFR              | EGFRp.(Ile744.)          | EGFRp.(Ile744.)               | 1.40  | 16.87 | WT                       | 0.00  | 18.92  | WT                            | 0.00  | 34.80  |
| 2455 | DI | 24/08/2021 | PIK3CA            | PIK3Cap.(Glu542Lys)      | PIK3Cap.(Glu545Lys)           | 1.90  | 16.87 | WT                       | 0.00  | 18.92  | PIK3Cap.(Glu542Lys)           | 2.80  | 34.80  |
| 2460 | DI | 24/08/2021 | BRAF              | BRAFp.(Val600Glu)        | BRAFp.(Val600Glu)             | 0.50  | 15.62 | WT                       | 0.00  | 30.51  | BRAFp.(Val600Glu)             | 0.70  | 30.30  |
| 2460 | DI | 24/08/2021 | PIK3CA            | PIK3Cap.(Glu545Lys)      | PIK3Cap.(Glu545Lys)           | 0.70  | 15.62 | WT                       | 0.00  | 30.51  | PIK3Cap.(Glu545Lys)           | 2.10  | 30.30  |
| 2462 | DI | 01/08/2022 | Wild-type (WT)    | Wild-type (WT)           | WT                            | 0.00  | 7.05  | WT                       | 0.00  | 10.29  | WT                            | 0.00  | 14.70  |
| 2463 | DI | 24/08/2021 | KRAS              | KRASp.(Gly12Val)         | KRASp.(Gly12Val)              | 1.20  | 26.87 | WT                       | 0.00  | 25.65  | KRASp.(Gly12Val)              | 1.40  | 27.00  |
| 2464 | P  | 24/08/2021 | EGFR              | EGFRp.(Thr790Met)        | EGFRp.(Thr790Met)             | 1.20  | 85.00 | EGFRp.(Thr790Met)        | 0.77  | 411.77 | WT                            | 0.00  | 150.00 |
| 2464 | P  | 24/08/2021 | EGFR              | EGFRp.(Leu858Arg)        | EGFRp.(Leu858Arg)             | 4.80  | 85.00 | EGFRp.(Leu858Arg)        | 2.80  | 411.77 | EGFRp.(Leu858Arg)             | 5.00  | 150.00 |
| 2466 | DI | 01/08/2022 | Wild-type (WT)    | Wild-type (WT)           | WT                            | 0.00  | 7.68  | WT                       | 0.00  | 16.90  | WT                            | 0.00  | 18.70  |
| 2471 | P  | 25/07/2022 | Wild-type (WT)    | Wild-type (WT)           | WT                            | 0.00  | 36.88 | NR                       | NR    | NR     | WT                            | 0.00  | 33.50  |
| 2472 | P  | 24/08/2021 | Other alterations | TP53p.(?)                | WT                            | 0.00  | 85.00 | NR                       | NR    | NR     | TP53p.(?)                     | 8.10  | 93.00  |
| 2472 | P  | 24/08/2021 | BRAF              | BRAFp.(Val600Glu)        | BRAFp.(Val600Glu)             | 7.70  | 85.00 | NR                       | NR    | NR     | BRAFp.(Val600Glu)             | 5.10  | 93.00  |
| 2473 | DI | 25/07/2022 | Wild-type (WT)    | Wild-type (WT)           | WT                            | 0.00  | 36.88 | WT                       | 0.00  | 124.07 | WT                            | 0.00  | 100.00 |
| 2476 | P  | 28/07/2022 | EGFR              | EGFRp.(Leu718Gln)        | EGFRp.(Leu718Gln)             | 0.18  | 36.81 | WT                       | 0.00  | 31.88  | WT                            | 0.00  | 100.00 |
| 2476 | P  | 28/07/2022 | EGFR              | EGFRp.(Thr790Met)        | EGFRp.(Thr790Met)             | 0.43  | 36.81 | EGFRp.(Thr790Met)        | 0.35  | 31.88  | WT                            | 0.00  | 100.00 |
| 2476 | P  | 28/07/2022 | EGFR              | EGFRp.(Leu858Arg)        | EGFRp.(Leu858Arg)             | 0.61  | 36.81 | EGFRp.(Leu858Arg)        | 0.30  | 31.88  | WT                            | 0.00  | 100.00 |
| 2477 | DI | 25/07/2022 | Wild-type (WT)    | Wild-type (WT)           | WT                            | 0.00  | 36.88 | WT                       | 0.00  | 30.30  | WT                            | 0.00  | 92.20  |
| 2478 | DI | 25/07/2022 | Wild-type (WT)    | Wild-type (WT)           | WT                            | 0.00  | 36.88 | WT                       | 0.00  | 220.44 | WT                            | 0.00  | 100.00 |
| 2481 | DI | 25/07/2022 | Wild-type (WT)    | Wild-type (WT)           | WT                            | 0.00  | 31.25 | WT                       | 0.00  | 29.16  | WT                            | 0.00  | 50.00  |
| 2482 | DI | 24/08/2021 | KRAS              | KRASp.(Gly12Asp)         | KRASp.(Gly12Asp)              | 1.20  | 16.75 | NR                       | NR    | NR     | KRASp.(Gly12Asp)              | 1.60  | 16.75  |
| 2482 | DI | 24/08/2021 | BRAF              | BRAFp.(Asn581Ile)        | BRAFp.(Asn581Ile)             | 1.40  | 16.75 | NR                       | NR    | NR     | BRAFp.(Asn581Ile)             | 1.40  | 16.75  |

|      |    |            |                   |                          |                          |       |       |                          |      |        |                          |       |        |
|------|----|------------|-------------------|--------------------------|--------------------------|-------|-------|--------------------------|------|--------|--------------------------|-------|--------|
| 2483 | DI | 18/07/2022 | Wild-type (WT)    | Wild-type (WT)           | WT                       | 0.00  | 36.81 | WT                       | 0.00 | 37.32  | WT                       | 0.00  | 50.00  |
| 2485 | P  | 02/08/2021 | Other alterations | TP53p.(Arg248Trp)        | WT                       | 0.00  | 10.05 | NR                       | NR   | NR     | TP53p.(Arg248Trp)        | 1.60  | 50.00  |
| 2485 | P  | 02/08/2021 | KRAS              | KRASp.(Gly12Cys)         | KRASp.(Gly12Cys)         | 4.73  | 10.05 | NR                       | NR   | NR     | KRASp.(Gly12Cys)         | 5.80  | 50.00  |
| 2486 | P  | 24/08/2021 | EGFR              | EGFRp.(Cys797Ser)        | EGFRp.(Cys797Ser)        | 0.20  | 36.25 | EGFRp.(Cys797Ser)        | 0.16 | 67.17  | WT                       | 0.00  | 84.40  |
| 2486 | P  | 24/08/2021 | EGFR              | EGFRp.(Thr790Met)        | EGFRp.(Thr790Met)        | 0.30  | 36.25 | EGFRp.(Thr790Met)        | 0.24 | 67.17  | WT                       | 0.00  | 84.40  |
| 2486 | P  | 24/08/2021 | EGFR              | EGFRp.(Glu746_Ala750del) | EGFRp.(Glu746_Ala750del) | 1.10  | 36.25 | EGFRp.(Glu746_Ala750del) | 1.29 | 67.17  | EGFRp.(Glu746_Ala750del) | 1.40  | 84.40  |
| 2490 | DI | 03/08/2022 | Wild-type (WT)    | Wild-type (WT)           | WT                       | 0.00  | 18.30 | NR                       | NR   | NR     | WT                       | 0.00  | 15.30  |
| 2497 | P  | 17/08/2022 | EGFR              | EGFRp.(Leu858Arg)        | EGFRp.(Leu858Arg)        | 0.28  | 23.66 | EGFRp.(Leu858Arg)        | 0.15 | 23.05  | WT                       | 0.00  | 28.30  |
| 2497 | P  | 17/08/2022 | KRAS              | KRASp.(Met72Leu)         | KRASp.(Met72Leu)         | 0.97  | 23.66 | WT                       | 0.00 | 23.05  | KRASp.(Met72Leu)         | 1.50  | 28.30  |
| 2547 | P  | 17/08/2022 | EGFR              | EGFRp.(Leu858Arg)        | EGFRp.(Leu858Arg)        | 0.30  | 37.50 | EGFRp.(Leu858Arg)        | 0.17 | 39.47  | WT                       | 0.00  | 37.00  |
| 2547 | P  | 17/08/2022 | KRAS              | KRASp.(Met72Leu)         | KRASp.(Met72Leu)         | 0.68  | 37.50 | WT                       | 0.00 | 39.47  | WT                       | 0.00  | 37.00  |
| 2549 | P  | 01/08/2022 | Wild-type (WT)    | Wild-type (WT)           | WT                       | 0.00  | 7.62  | WT                       | 0.00 | 5.42   | WT                       | 0.00  | 9.80   |
| 2579 | ND | 12/08/2022 | Wild-type (WT)    | Wild-type (WT)           | WT                       | 0.00  | 25.00 | NR                       | NR   | NR     | WT                       | 0.00  | 22.50  |
| 2599 | P  | 12/08/2022 | Wild-type (WT)    | Wild-type (WT)           | WT                       | 0.00  | 36.81 | NR                       | NR   | NR     | WT                       | 0.00  | 32.50  |
| 2652 | P  | 12/08/2022 | Wild-type (WT)    | Wild-type (WT)           | WT                       | 0.00  | 36.81 | NR                       | NR   | NR     | WT                       | 0.00  | 34.00  |
| 2700 | P  | 18/07/2022 | EGFR              | EGFRp.(Leu861Gln)        | EGFRp.(Leu861Gln)        | 0.35  | 36.81 | EGFRp.(Leu861Gln)        | 0.22 | 39.92  | WT                       | 0.00  | 52.30  |
| 2708 | DI | 01/08/2022 | Wild-type (WT)    | Wild-type (WT)           | WT                       | 0.00  | 4.44  | WT                       | 0.00 | 16.80  | WT                       | 0.00  | 19.40  |
| 2710 | DI | 28/07/2022 | Wild-type (WT)    | Wild-type (WT)           | WT                       | 0.00  | 19.81 | WT                       | 0.00 | 45.81  | WT                       | 0.00  | 41.10  |
| 2711 | P  | 28/07/2022 | Wild-type (WT)    | Wild-type (WT)           | WT                       | 0.00  | 12.09 | WT                       | 0.00 | 6.40   | WT                       | 0.00  | 10.32  |
| 2724 | P  | 18/07/2022 | EGFR              | EGFRp.(Ser768Ile)        | EGFRp.(Ser768Ile)        | 0.39  | 31.25 | WT                       | 0.00 | 43.13  | WT                       | 0.00  | 66.00  |
| 2724 | P  | 18/07/2022 | EGFR              | EGFRp.(Gly719Ser)        | EGFRp.(Gly719Ser)        | 0.45  | 31.25 | EGFRp.(Gly719Ser)        | 0.12 | 43.13  | EGFRp.(Gly719Ser)        | 0.50  | 66.00  |
| 2791 | P  | 12/08/2022 | Wild-type (WT)    | Wild-type (WT)           | WT                       | 0.00  | 36.81 | NR                       | NR   | NR     | WT                       | 0.00  | 59.30  |
| 2824 | P  | 12/08/2022 | Wild-type (WT)    | Wild-type (WT)           | WT                       | 0.00  | 31.38 | NR                       | NR   | NR     | WT                       | 0.00  | 28.60  |
| 2849 | P  | 03/08/2022 | Wild-type (WT)    | Wild-type (WT)           | WT                       | 0.00  | 15.30 | NR                       | NR   | NR     | WT                       | 0.00  | 13.25  |
| 2850 | P  | 03/08/2022 | Wild-type (WT)    | Wild-type (WT)           | WT                       | 0.00  | 15.00 | NR                       | NR   | NR     | WT                       | 0.00  | 12.99  |
| 2856 | P  | 03/08/2022 | Wild-type (WT)    | Wild-type (WT)           | WT                       | 0.00  | 16.80 | NR                       | NR   | NR     | WT                       | 0.00  | 14.60  |
| 2857 | P  | 12/08/2022 | Wild-type (WT)    | Wild-type (WT)           | WT                       | 0.00  | 36.81 | NR                       | NR   | NR     | WT                       | 0.00  | 100.00 |
| 2859 | DI | 12/08/2022 | Wild-type (WT)    | Wild-type (WT)           | WT                       | 0.00  | 36.81 | NR                       | NR   | NR     | WT                       | 0.00  | 31.20  |
| 2860 | P  | 03/08/2022 | Wild-type (WT)    | Wild-type (WT)           | WT                       | 0.00  | 9.00  | NR                       | NR   | NR     | WT                       | 0.00  | 27.00  |
| 2861 | DI | 12/08/2022 | Wild-type (WT)    | Wild-type (WT)           | WT                       | 0.00  | 36.81 | NR                       | NR   | NR     | WT                       | 0.00  | 48.45  |
| 2862 | P  | 12/08/2022 | Wild-type (WT)    | Wild-type (WT)           | WT                       | 0.00  | 36.81 | NR                       | NR   | NR     | WT                       | 0.00  | 100.00 |
| 2864 | DI | 12/08/2022 | Wild-type (WT)    | Wild-type (WT)           | WT                       | 0.00  | 36.81 | NR                       | NR   | NR     | WT                       | 0.00  | 41.10  |
| 2865 | DI | 12/08/2022 | Wild-type (WT)    | Wild-type (WT)           | WT                       | 0.00  | 34.63 | NR                       | NR   | NR     | WT                       | 0.00  | 36.60  |
| 2866 | P  | 03/08/2022 | Wild-type (WT)    | Wild-type (WT)           | WT                       | 0.00  | 18.00 | NR                       | NR   | NR     | WT                       | 0.00  | 15.50  |
| 2867 | P  | 12/08/2022 | Wild-type (WT)    | Wild-type (WT)           | WT                       | 0.00  | 34.63 | NR                       | NR   | NR     | WT                       | 0.00  | 28.10  |
| 2870 | DI | 12/08/2022 | Wild-type (WT)    | Wild-type (WT)           | WT                       | 0.00  | 33.75 | NR                       | NR   | NR     | WT                       | 0.00  | 28.90  |
| 2871 | DI | 12/08/2022 | Wild-type (WT)    | Wild-type (WT)           | WT                       | 0.00  | 36.81 | NR                       | NR   | NR     | WT                       | 0.00  | 58.20  |
| 2873 | P  | 03/08/2022 | Wild-type (WT)    | Wild-type (WT)           | WT                       | 0.00  | 18.30 | NR                       | NR   | NR     | WT                       | 0.00  | 15.75  |
| 2874 | P  | 03/08/2022 | Wild-type (WT)    | Wild-type (WT)           | WT                       | 0.00  | 18.30 | NR                       | NR   | NR     | WT                       | 0.00  | 15.75  |
| 2875 | P  | 12/08/2022 | Wild-type (WT)    | Wild-type (WT)           | WT                       | 0.00  | 36.81 | NR                       | NR   | NR     | WT                       | 0.00  | 38.50  |
| 2876 | DI | 03/08/2022 | KRAS              | KRASp.(Lys117Asn)        | KRASp.(Lys117Asn)        | 0.35  | 17.40 | NR                       | NR   | NR     | WT                       | 0.00  | 15.10  |
| 2877 | P  | 17/08/2022 | Wild-type (WT)    | Wild-type (WT)           | WT                       | 0.00  | 24.39 | NR                       | NR   | NR     | WT                       | 0.00  | 19.80  |
| 2878 | DI | 17/08/2022 | Wild-type (WT)    | Wild-type (WT)           | WT                       | 0.00  | 39.06 | NR                       | NR   | NR     | WT                       | 0.00  | 32.80  |
| 2892 | DI | 03/08/2022 | Wild-type (WT)    | Wild-type (WT)           | WT                       | 0.00  | 14.40 | NR                       | NR   | NR     | WT                       | 0.00  | 12.50  |
| 2893 | P  | 17/08/2022 | Other alterations | NOTCH1p.(Pro2415del)     | WT                       | 0.00  | 33.99 | NR                       | NR   | NR     | NOTCH1p.(Pro2415del)     | 3.10  | 26.80  |
| 2899 | P  | 28/07/2022 | Wild-type (WT)    | Wild-type (WT)           | WT                       | 0.00  | 8.25  | WT                       | 0.00 | 6.81   | WT                       | 0.00  | 12.20  |
| 2904 | P  | 01/08/2022 | Wild-type (WT)    | Wild-type (WT)           | WT                       | 0.00  | 13.53 | WT                       | 0.00 | 15.63  | WT                       | 0.00  | 26.10  |
| 2905 | P  | 01/08/2022 | Other alterations | TP53p.(Arg158Pro)        | WT                       | 0.00  | 36.81 | WT                       | 0.00 | 153.04 | TP53p.(Arg158Pro)        | 37.20 | 100.00 |
| 2906 | DI | 01/08/2022 | Wild-type (WT)    | Wild-type (WT)           | WT                       | 0.00  | 4.38  | WT                       | 0.00 | 25.42  | WT                       | 0.00  | 63.60  |
| 2908 | DI | 01/08/2022 | Wild-type (WT)    | Wild-type (WT)           | WT                       | 0.00  | 12.33 | WT                       | 0.00 | 17.72  | WT                       | 0.00  | 30.40  |
| 2909 | P  | 17/08/2022 | Other alterations | TP53p.(Val157Phe)        | WT                       | 0.00  | 37.50 | NR                       | NR   | NR     | TP53p.(Val157Phe)        | 1.80  | 100.00 |
| 2909 | P  | 17/08/2022 | EGFR              | EGFRp.(Leu833Phe)        | WT                       | 0.00  | 37.50 | NR                       | NR   | NR     | EGFRp.(Leu833Phe)        | 85.60 | 100.00 |
| 2909 | P  | 17/08/2022 | EGFR              | EGFRp.(Cys797Ser)        | EGFRp.(Cys797Ser)        | 0.20  | 37.50 | NR                       | NR   | NR     | WT                       | 0.00  | 100.00 |
| 2909 | P  | 17/08/2022 | EGFR              | EGFRp.(Thr790Met)        | EGFRp.(Thr790Met)        | 1.00  | 37.50 | NR                       | NR   | NR     | EGFRp.(Thr790Met)        | 1.10  | 100.00 |
| 2909 | P  | 17/08/2022 | EGFR              | EGFRp.(Leu861Gln)        | EGFRp.(Leu861Gln)        | 82.25 | 37.50 | NR                       | NR   | NR     | EGFRp.(Leu861Gln)        | 85.00 | 100.00 |
| 2910 | DI | 17/08/2022 | Wild-type (WT)    | Wild-type (WT)           | WT                       | 0.00  | 37.50 | NR                       | NR   | NR     | WT                       | 0.00  | 31.70  |
| 2911 | DI | 17/08/2022 | Wild-type (WT)    | Wild-type (WT)           | WT                       | 0.00  | 37.50 | NR                       | NR   | NR     | WT                       | 0.00  | 100.00 |
| 2912 | DI | 17/08/2022 | KRAS              | KRASp.(Gly12Asp)         | KRASp.(Gly12Asp)         | 0.29  | 37.50 | NR                       | NR   | NR     | WT                       | 0.00  | 100.00 |
| 2914 | DI | 17/08/2022 | Wild-type (WT)    | Wild-type (WT)           | WT                       | 0.00  | 37.50 | NR                       | NR   | NR     | WT                       | 0.00  | 61.00  |

|      |    |            |                   |                          |                           |       |       |                          |       |       |                           |       |        |
|------|----|------------|-------------------|--------------------------|---------------------------|-------|-------|--------------------------|-------|-------|---------------------------|-------|--------|
| 2915 | DI | 17/08/2022 | Other alterations | TP53p.(His179Tyr)        | WT                        | 0.00  | 37.50 | NR                       | NR    | NR    | TP53p.(His179Tyr)         | 26.20 | 36.20  |
| 2916 | P  | 17/08/2022 | Wild-type (WT)    | Wild-type (WT)           | WT                        | 0.00  | 33.30 | NR                       | NR    | NR    | WT                        | 0.00  | 28.90  |
| 2917 | P  | 18/07/2022 | BRAF              | BRAFp.(Val600Glu)        | BRAFp.(Val600Glu)         | 1.00  | 36.81 | NR                       | NR    | NR    | BRAFp.(Val600Glu)         | 1.50  | 100.00 |
| 2917 | P  | 18/07/2022 | PIK3CA            | PIK3CAp.(Glu545Lys)      | PIK3CAp.(Glu545Lys)       | 1.22  | 36.81 | NR                       | NR    | NR    | PIK3CAp.(Glu545Lys)       | 1.80  | 100.00 |
| 2918 | DI | 18/07/2022 | Wild-type (WT)    | Wild-type (WT)           | WT                        | 0.00  | 31.25 | NR                       | NR    | NR    | WT                        | 0.00  | 27.30  |
| 2919 | P  | 18/07/2022 | Other alterations | TP53p.(Ile255Phe)        | WT                        | 0.00  | 36.81 | NR                       | NR    | NR    | TP53p.(Ile255Phe)         | 1.60  | 59.70  |
| 2919 | P  | 18/07/2022 | Other alterations | GNASp.(Arg201His)        | WT                        | 0.00  | 36.81 | NR                       | NR    | NR    | GNASp.(Arg201His)         | 7.90  | 59.70  |
| 2919 | P  | 18/07/2022 | EGFR              | EGFRp.(Leu861Gln)        | EGFRp.(Leu861Gln)         | 4.00  | 36.81 | NR                       | NR    | NR    | EGFRp.(Leu861Gln)         | 4.90  | 59.70  |
| 2920 | DI | 30/06/2022 | Wild-type (WT)    | Wild-type (WT)           | WT                        | 0.00  | 36.25 | NR                       | NR    | NR    | WT                        | 0.00  | 100.00 |
| 2921 | P  | 30/06/2022 | Other alterations | TP53p.(Gln331*)          | WT                        | 0.00  | 36.25 | NR                       | NR    | NR    | TP53p.(Gln331*)           | 8.10  | 73.70  |
| 2921 | P  | 30/06/2022 | PIK3CA            | PIK3CAp.(Glu545Lys)      | PIK3CAp.(Glu545Lys)       | 2.00  | 36.25 | NR                       | NR    | NR    | PIK3CAp.(Glu545Lys)       | 2.50  | 73.70  |
| 2922 | P  | 30/06/2022 | Wild-type (WT)    | Wild-type (WT)           | WT                        | 0.00  | 25.00 | NR                       | NR    | NR    | WT                        | 0.00  | 30.40  |
| 2923 | P  | 30/06/2022 | Wild-type (WT)    | Wild-type (WT)           | WT                        | 0.00  | 36.25 | NR                       | NR    | NR    | WT                        | 0.00  | 47.80  |
| 2924 | P  | 30/06/2022 | Wild-type (WT)    | Wild-type (WT)           | WT                        | 0.00  | 25.00 | NR                       | NR    | NR    | WT                        | 0.00  | 26.80  |
| 2926 | DI | 30/06/2022 | Wild-type (WT)    | Wild-type (WT)           | WT                        | 0.00  | 36.25 | NR                       | NR    | NR    | WT                        | 0.00  | 72.80  |
| 2927 | DI | 30/06/2022 | Wild-type (WT)    | Wild-type (WT)           | WT                        | 0.00  | 36.25 | NR                       | NR    | NR    | WT                        | 0.00  | 77.80  |
| 2928 | DI | 30/06/2022 | Wild-type (WT)    | Wild-type (WT)           | WT                        | 0.00  | 25.00 | NR                       | NR    | NR    | WT                        | 0.00  | 25.30  |
| 2929 | DI | 30/06/2022 | Other alterations | TP53p.(Asn131del)        | WT                        | 0.00  | 36.25 | NR                       | NR    | NR    | TP53p.(Asn131del)         | 38.70 | 100.00 |
| 2930 | P  | 30/06/2022 | BRAF              | BRAFp.(Val600Glu)        | BRAFp.(Val600Glu)         | 33.00 | 36.25 | NR                       | NR    | NR    | BRAFp.(Val600Glu)         | 33.80 | 100.00 |
| 2931 | P  | 30/06/2022 | Other alterations | TP53p.(Glu224*)          | WT                        | 0.00  | 36.25 | NR                       | NR    | NR    | TP53p.(Glu224*)           | 5.40  | 57.70  |
| 2932 | DI | 30/06/2022 | Other alterations | TP53p.(Ile255del)        | WT                        | 0.00  | 36.25 | NR                       | NR    | NR    | TP53p.(Ile255del)         | 1.60  | 75.00  |
| 2932 | DI | 30/06/2022 | KRAS              | KRASp.(Gly12Cys)         | KRASp.(Gly12Cys)          | 2.00  | 36.25 | NR                       | NR    | NR    | KRASp.(Gly12Cys)          | 2.20  | 75.00  |
| 2933 | DI | 30/06/2022 | Wild-type (WT)    | Wild-type (WT)           | WT                        | 0.00  | 36.25 | NR                       | NR    | NR    | WT                        | 0.00  | 100.00 |
| 2934 | P  | 30/06/2022 | Other alterations | TP53p.(Val172Phe)        | WT                        | 0.00  | 20.00 | NR                       | NR    | NR    | TP53p.(Val172Phe)         | 0.40  | 20.50  |
| 2934 | P  | 30/06/2022 | EGFR              | EGFRp.(Gly719Cys)        | EGFRp.(Gly719Cys)         | 0.00  | 20.00 | NR                       | NR    | NR    | EGFRp.(Gly719Cys)         | 0.50  | 20.50  |
| 2935 | DI | 30/06/2022 | Other alterations | TP53p.(Arg248Trp)        | WT                        | 0.00  | 25.00 | NR                       | NR    | NR    | TP53p.(Arg248Trp)         | 2.50  | 30.40  |
| 2935 | DI | 30/06/2022 | KRAS              | KRASp.(Gly12Cys)         | KRASp.(Gly12Cys)          | 4.00  | 25.00 | NR                       | NR    | NR    | KRASp.(Gly12Cys)          | 4.20  | 30.40  |
| 2937 | DI | 23/06/2022 | Other alterations | H3F3Ap.(Ser29Thr)        | WT                        | 0.00  | 12.50 | NR                       | NR    | NR    | H3F3Ap.(Ser29Thr)         | 13.20 | 20.50  |
| 2938 | DI | 23/06/2022 | Wild-type (WT)    | Wild-type (WT)           | WT                        | 0.00  | 36.25 | NR                       | NR    | NR    | WT                        | 0.00  | 53.80  |
| 2939 | DI | 23/06/2022 | Wild-type (WT)    | Wild-type (WT)           | WT                        | 0.00  | 36.25 | NR                       | NR    | NR    | WT                        | 0.00  | 38.00  |
| 2940 | P  | 23/06/2022 | Wild-type (WT)    | Wild-type (WT)           | WT                        | 0.00  | 25.00 | NR                       | NR    | NR    | WT                        | 0.00  | 42.00  |
| 2941 | DI | 23/06/2022 | Other alterations | TP53p.(Ser215Gly)        | WT                        | 0.00  | 16.75 | NR                       | NR    | NR    | TP53p.(Ser215Gly)         | 3.00  | 28.30  |
| 2941 | DI | 23/06/2022 | Other alterations | TP53p.(Cys275Tyr)        | WT                        | 0.00  | 16.75 | NR                       | NR    | NR    | TP53p.(Cys275Tyr)         | 9.10  | 28.30  |
| 2941 | DI | 23/06/2022 | EGFR              | EGFRp.(Leu858Arg)        | EGFRp.(Leu858Arg)         | 12.00 | 16.75 | NR                       | NR    | NR    | EGFRp.(Leu858Arg)         | 12.30 | 28.30  |
| 2942 | P  | 23/06/2022 | BRAF              | BRAFp.(Val600Glu)        | BRAFp.(Val600Glu)         | 2.00  | 36.25 | NR                       | NR    | NR    | BRAFp.(Val600Glu)         | 2.30  | 100.00 |
| 2943 | DI | 23/06/2022 | KRAS              | KRASp.(Gly13Val)         | KRASp.(Gly13Val)          | 1.00  | 20.00 | NR                       | NR    | NR    | KRASp.(Gly13Val)          | 0.60  | 62.10  |
| 1599 | DI | 20/07/2022 | EGFR              | EGFRp.(Glu746_Ala750del) | EG-FRp.(Glu746_Ala750del) | 20.02 | 36.81 | EGFRp.(Glu746_Ala750del) | 14.14 | 71.17 | EG-FRp.(Glu746_Ala750del) | 10.60 | 50.00  |
